# Supplementary material for: Evaluating the contribution of gut microbiome to the variance of porcine serum glucose and lipid concentration
Source: PubMed Central journal article supplement (PMC5668236; doi:10.1038/s41598-017-15044-x), 2017-11-02
Supplement: 41598_2017_15044_MOESM1_ESM.pdf [file 41598_2017_15044_MOESM1_ESM.pdf]

# **Evaluating the contribution of gut microbiome to the variance of porcine serum glucose and lipid concentration**

Xiaochang Huang, Shaoming Fang, Hui Yang, Jun Gao, Maozhang He, Shanlin Ke, Yuanzhang  
Zhao, Congying Chen \*, Lusheng Huang \*

Running title: Gut microbiota associated with serum lipids

## **Address for correspondence**

Congying Chen (chcy75@hotmail.com), Lusheng Huang (lushenghuang@hotmail.com)

State Key Laboratory of Pig Genetic Improvement and Production Technology Jiangxi  
Agricultural University

Nanchang, 330045, P. R. China

Phone: 0086 - 791 - 89813080

Fax: 0086 -791 – 83900189

**Supplementary Figure 1:**  $\alpha$ -diversity and microbial composition of porcine cecum luminal samples. **(a).** Boxplots of observed species and Shannon index between males and females; **(b).** Microbial composition of cecum luminal samples at phylum level and genus level.

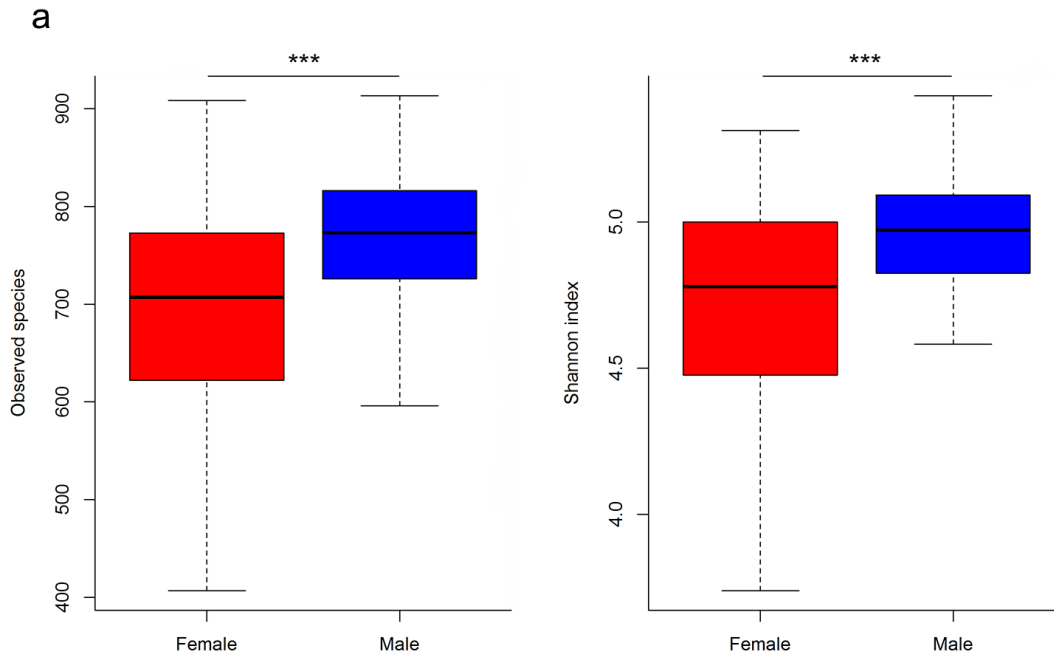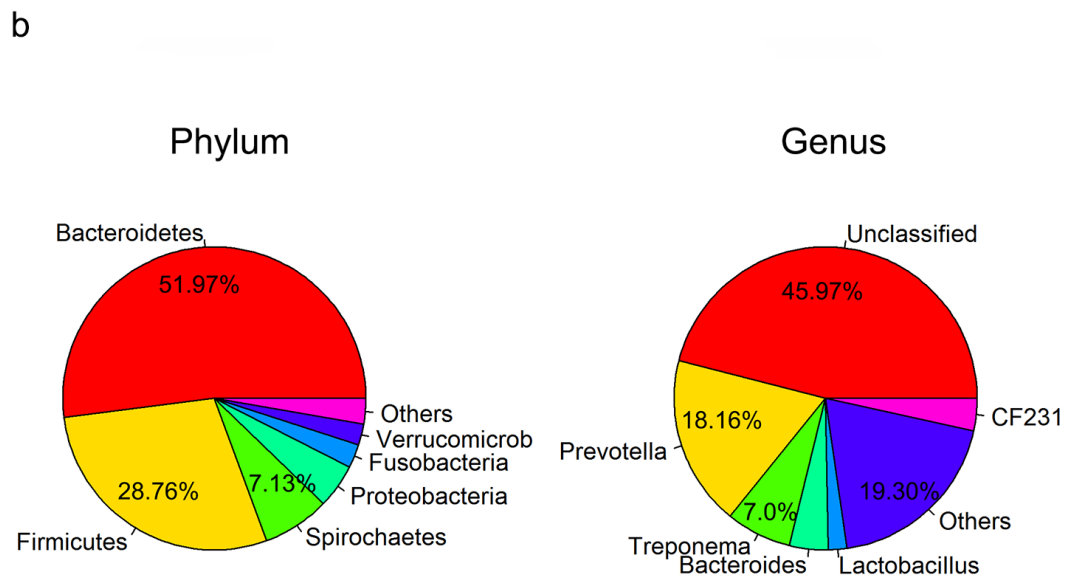

**Note:****Estimate\_q:** The estimated regression coefficient in the quantitative model**Estimate\_b:** The estimated regression coefficient in the binary model**T\_value\_q:** The test statistics T value in the quantitative model**T\_value\_b:** The test statistics T value in the binary model**meta\_z\_score:** the comparative unweighted Z score in the meta-analysis**P\_meta:** the comparative P value in the meta-analysis**final\_p\_value:** the minimum of P values from the binary analysis, quantitative analysis and meta-analysis**Supplementary Table 1: OTUs significantly associated with blood glucose (GLU)**

| ID                     | Estimate_q* | Estimate_b | T_value_q | P_value_q | T_value_b | P_value_b | meta_z_score | P_meta   | GLU_final_p_value |
|------------------------|-------------|------------|-----------|-----------|-----------|-----------|--------------|----------|-------------------|
| Otu363_Corynebacterium | -0.27       | -0.74      | -0.59     | 5.53E-01  | -3.34     | 9.71E-04  | -2.75        | 5.93E-03 | 9.71E-04          |
| Otu197_Bacteroidales   | -0.93       | -1.52      | -3.82     | 1.72E-04  | -2.12     | 3.50E-02  | -4.15        | 3.35E-05 | 3.35E-05          |
| Otu2316_Bacteroidales  | -0.63       | -0.76      | -2.02     | 4.57E-02  | -3.37     | 8.74E-04  | -3.77        | 1.66E-04 | 1.66E-04          |
| Otu1540_Bacteroidales  | 1.29        | 0.37       | 2.88      | 4.53E-03  | 1.54      | 1.24E-01  | 3.09         | 1.98E-03 | 1.98E-03          |
| Otu1100_Bacteroidales  | -0.40       | -0.66      | -1.29     | 1.98E-01  | -2.93     | 3.66E-03  | -2.97        | 3.02E-03 | 3.02E-03          |
| Otu891_Bacteroides     | -0.17       | -1.32      | -0.55     | 5.82E-01  | -4.69     | 4.61E-06  | -3.63        | 2.85E-04 | 4.61E-06          |
| Otu160_Bacteroides     | -0.46       | -1.20      | -1.42     | 1.63E-01  | -4.57     | 7.94E-06  | -4.15        | 3.40E-05 | 7.94E-06          |
| Otu152_Bacteroides     | -0.38       | -0.92      | -1.57     | 1.20E-01  | -4.10     | 5.71E-05  | -3.94        | 7.99E-05 | 5.71E-05          |
| Otu119_Bacteroides     | 0.07        | -1.20      | 0.38      | 7.08E-01  | -3.95     | 1.04E-04  | 2.48         | 1.32E-02 | 1.04E-04          |
| Otu2183_Bacteroides    | -0.11       | -2.12      | -0.59     | 5.54E-01  | -3.86     | 1.43E-04  | -3.11        | 1.89E-03 | 1.43E-04          |
| Otu107_Bacteroides     | -0.44       | -0.72      | -2.19     | 3.04E-02  | -3.23     | 1.39E-03  | -3.79        | 1.50E-04 | 1.50E-04          |
| Otu2736_Bacteroides    | -0.40       | -1.34      | -0.98     | 3.39E-01  | -3.72     | 2.49E-04  | -3.27        | 1.09E-03 | 2.49E-04          |
| Otu2265_Bacteroides    | -0.38       | -0.84      | -1.50     | 1.37E-01  | -3.52     | 5.11E-04  | -3.51        | 4.51E-04 | 4.51E-04          |
| Otu251_Bacteroides     | -0.13       | -1.24      | -0.24     | 8.15E-01  | -3.43     | 7.01E-04  | -2.56        | 1.04E-02 | 7.01E-04          |
| Otu2237_Bacteroides    | -0.64       | -0.97      | -2.54     | 1.18E-02  | -1.88     | 6.10E-02  | -3.11        | 1.90E-03 | 1.90E-03          |

|                                      |       |       |       |          |       |          |       |          |          |
|--------------------------------------|-------|-------|-------|----------|-------|----------|-------|----------|----------|
| <b>Otu32_Bacteroides_coprophilus</b> | -0.48 | -1.18 | -2.81 | 5.69E-03 | -5.53 | 8.28E-08 | -5.75 | 9.15E-09 | 9.15E-09 |
| <b>Otu188_Bacteroides_fragilis</b>   | -0.88 | -0.71 | -2.20 | 3.16E-02 | -2.84 | 4.83E-03 | -3.51 | 4.44E-04 | 4.44E-04 |
| <b>Otu108_Bacteroides_plebeius</b>   | -0.63 | -0.64 | -3.10 | 2.38E-03 | -2.89 | 4.17E-03 | -4.17 | 3.00E-05 | 3.00E-05 |
| <b>Otu27_BS11</b>                    | -0.44 | 0.22  | -3.10 | 2.25E-03 | 0.81  | 4.18E-01 | 1.59  | 1.12E-01 | 2.25E-03 |
| <b>Otu334_Paraprevotellaceae</b>     | -0.57 | -1.01 | -2.39 | 1.78E-02 | -3.19 | 1.59E-03 | -3.91 | 9.31E-05 | 9.31E-05 |
| <b>Otu380_Paraprevotellaceae</b>     | 0.50  | 0.68  | 2.24  | 2.66E-02 | 3.02  | 2.79E-03 | 3.68  | 2.32E-04 | 2.32E-04 |
| <b>Otu71_Paraprevotellaceae</b>      | -0.32 | -0.61 | -1.88 | 6.15E-02 | -2.57 | 1.06E-02 | -3.13 | 1.76E-03 | 1.76E-03 |
| <b>Otu73_CF231</b>                   | -0.72 | -0.88 | -3.56 | 4.43E-04 | -1.00 | 3.20E-01 | -3.19 | 1.44E-03 | 4.43E-04 |
| <b>Otu1530_Prevotella</b>            | 0.03  | -1.33 | 0.22  | 8.28E-01 | -4.07 | 6.50E-05 | 2.67  | 7.58E-03 | 6.50E-05 |
| <b>Otu929_Prevotella</b>             | -0.69 | -0.51 | -3.22 | 1.51E-03 | -1.56 | 1.20E-01 | -3.34 | 8.31E-04 | 8.31E-04 |
| <b>Otu47_Prevotella</b>              | -0.37 | -0.72 | -1.57 | 1.21E-01 | -2.91 | 3.99E-03 | -3.13 | 1.73E-03 | 1.73E-03 |
| <b>Otu194_Prevotella</b>             | -0.19 | -0.75 | -0.80 | 4.22E-01 | -3.17 | 1.73E-03 | -2.78 | 5.40E-03 | 1.73E-03 |
| <b>Otu51_YRC22</b>                   | -0.54 | -0.20 | -3.23 | 1.55E-03 | -0.89 | 3.75E-01 | -2.86 | 4.17E-03 | 1.55E-03 |
| <b>Otu2674_Parabacteroides</b>       | -1.42 | 0.11  | -4.20 | 3.79E-05 | NA    | NA       | -3.96 | NA       | 3.79E-05 |
| <b>Otu2269_Parabacteroides</b>       | -1.09 | -1.96 | -3.25 | 1.31E-03 | -2.24 | 2.59E-02 | -3.85 | 1.19E-04 | 1.19E-04 |
| <b>Otu255_Parabacteroides</b>        | -1.11 | -2.27 | -3.52 | 5.16E-04 | -1.30 | 1.96E-01 | -3.37 | 7.51E-04 | 5.16E-04 |
| <b>Otu960_Parabacteroides</b>        | -0.95 | -0.67 | -2.67 | 8.10E-03 | -2.12 | 3.49E-02 | -3.36 | 7.68E-04 | 7.68E-04 |
| <b>Otu688_Parabacteroides</b>        | -0.78 | -0.69 | -2.52 | 1.24E-02 | -2.13 | 3.44E-02 | -3.26 | 1.10E-03 | 1.10E-03 |
| <b>Otu2415_Parabacteroides</b>       | -0.93 | -1.09 | -2.76 | 6.29E-03 | -1.63 | 1.05E-01 | -3.08 | 2.09E-03 | 2.09E-03 |
| <b>Otu331_S24-7</b>                  | -0.51 | -0.73 | -1.95 | 5.22E-02 | -2.33 | 2.05E-02 | -3.01 | 2.60E-03 | 2.60E-03 |
| <b>Otu457_YS2</b>                    | 0.02  | 0.76  | 0.05  | 9.58E-01 | 3.38  | 8.45E-04 | 2.40  | 1.65E-02 | 8.45E-04 |
| <b>Otu2242_YS2</b>                   | 0.94  | -0.01 | 3.15  | 2.01E-03 | -0.04 | 9.70E-01 | -2.16 | 3.10E-02 | 2.01E-03 |
| <b>Otu23_Turcibacter</b>             | 0.81  | 1.27  | 3.75  | 2.20E-04 | 1.02  | 3.09E-01 | 3.33  | 8.63E-04 | 2.20E-04 |
| <b>Otu1839_Clostridiales</b>         | 2.38  | 1.03  | 3.60  | 5.52E-04 | 4.48  | 1.15E-05 | 5.55  | 2.94E-08 | 2.94E-08 |
| <b>Otu596_Clostridiales</b>          | 1.61  | 0.52  | 3.97  | 1.22E-04 | 2.33  | 2.04E-02 | 4.36  | 1.32E-05 | 1.32E-05 |
| <b>Otu1638_Clostridiales</b>         | 1.23  | 0.69  | 2.76  | 6.64E-03 | 3.10  | 2.18E-03 | 4.09  | 4.38E-05 | 4.38E-05 |

|                             |       |       |       |          |       |          |       |          |          |
|-----------------------------|-------|-------|-------|----------|-------|----------|-------|----------|----------|
| Otu2107_Clostridiales       | 0.81  | 0.80  | 2.46  | 1.49E-02 | 3.38  | 8.49E-04 | 4.08  | 4.50E-05 | 4.50E-05 |
| Otu2352_Clostridiales       | 1.46  | 0.25  | 3.70  | 3.21E-04 | 1.08  | 2.80E-01 | 3.31  | 9.37E-04 | 3.21E-04 |
| Otu697_Clostridiales        | -0.39 | 0.81  | -0.66 | 5.09E-01 | 3.52  | 5.13E-04 | -1.99 | 4.67E-02 | 5.13E-04 |
| Otu455_Clostridiales        | 1.75  | -0.22 | 3.47  | 7.90E-04 | -0.97 | 3.34E-01 | -1.69 | 9.11E-02 | 7.90E-04 |
| Otu501_Clostridiales        | 1.00  | 0.44  | 2.87  | 4.69E-03 | 1.82  | 6.97E-02 | 3.28  | 1.03E-03 | 1.03E-03 |
| Otu1925_Clostridiales       | 1.44  | -0.06 | 3.10  | 2.43E-03 | -0.27 | 7.89E-01 | -1.96 | 5.05E-02 | 2.43E-03 |
| Otu646_Christensenellaceae  | -1.81 | -0.65 | -3.20 | 1.86E-03 | -2.87 | 4.54E-03 | -4.21 | 2.59E-05 | 2.59E-05 |
| Otu803_Christensenellaceae  | -0.74 | -0.61 | -2.04 | 4.29E-02 | -2.14 | 3.31E-02 | -2.94 | 3.30E-03 | 3.30E-03 |
| Otu231_Clostridiaceae       | 0.75  | 1.90  | 3.13  | 2.00E-03 | 1.54  | 1.26E-01 | 3.27  | 1.08E-03 | 1.08E-03 |
| Otu33_Clostridium_butyricum | 0.64  | 1.28  | 2.65  | 8.64E-03 | 1.78  | 7.61E-02 | 3.11  | 1.86E-03 | 1.86E-03 |
| Otu132_Lachnospiraceae      | 1.48  | 1.12  | 7.17  | 1.14E-11 | 2.71  | 7.25E-03 | 6.70  | 2.11E-11 | 1.14E-11 |
| Otu1914_Lachnospiraceae     | 0.01  | 1.58  | 0.04  | 9.72E-01 | 5.94  | 1.01E-08 | 4.08  | 4.57E-05 | 1.01E-08 |
| Otu509_Lachnospiraceae      | 1.11  | 1.17  | 3.90  | 1.34E-04 | 4.36  | 1.92E-05 | 5.72  | 1.05E-08 | 1.05E-08 |
| Otu75_Lachnospiraceae       | 0.94  | 0.75  | 5.77  | 2.81E-08 | 2.14  | 3.36E-02 | 5.43  | 5.66E-08 | 2.81E-08 |
| Otu2502_Lachnospiraceae     | 0.94  | 1.20  | 3.36  | 9.63E-04 | 4.65  | 5.57E-06 | 5.55  | 2.92E-08 | 2.92E-08 |
| Otu849_Lachnospiraceae      | 1.11  | 1.27  | 4.04  | 7.45E-05 | 3.57  | 4.27E-04 | 5.29  | 1.21E-07 | 1.21E-07 |
| Otu1335_Lachnospiraceae     | 1.38  | 0.92  | 3.41  | 8.86E-04 | 4.19  | 3.86E-05 | 5.26  | 1.43E-07 | 1.43E-07 |
| Otu196_Lachnospiraceae      | 1.33  | 1.23  | 5.40  | 1.67E-07 | 1.40  | 1.62E-01 | 4.69  | 2.75E-06 | 1.67E-07 |
| Otu1363_Lachnospiraceae     | 2.56  | 0.60  | 4.68  | 7.92E-06 | 2.70  | 7.50E-03 | 5.05  | 4.43E-07 | 4.43E-07 |
| Otu1639_Lachnospiraceae     | 0.37  | 1.33  | 0.98  | 3.26E-01 | 5.06  | 8.58E-07 | 4.17  | 2.99E-05 | 8.58E-07 |
| Otu1537_Lachnospiraceae     | 0.76  | 1.14  | 3.68  | 2.95E-04 | 3.27  | 1.25E-03 | 4.84  | 1.28E-06 | 1.28E-06 |
| Otu1168_Lachnospiraceae     | 0.93  | 1.04  | 3.65  | 3.28E-04 | 3.27  | 1.22E-03 | 4.83  | 1.39E-06 | 1.39E-06 |
| Otu1903_Lachnospiraceae     | 0.81  | 0.93  | 3.38  | 8.82E-04 | 3.40  | 7.96E-04 | 4.72  | 2.32E-06 | 2.32E-06 |
| Otu144_Lachnospiraceae      | 0.99  | 0.80  | 4.82  | 2.69E-06 | 1.77  | 7.86E-02 | 4.56  | 5.06E-06 | 2.69E-06 |
| Otu225_Lachnospiraceae      | 1.15  | 0.92  | 2.91  | 4.88E-03 | 3.80  | 1.83E-04 | 4.64  | 3.55E-06 | 3.55E-06 |
| Otu1407_Lachnospiraceae     | 1.40  | 0.83  | 2.83  | 5.63E-03 | 3.73  | 2.35E-04 | 4.56  | 5.16E-06 | 5.16E-06 |

|                         |      |       |      |          |       |          |       |          |          |
|-------------------------|------|-------|------|----------|-------|----------|-------|----------|----------|
| Otu242_Lachnospiraceae  | 1.08 | 0.44  | 4.61 | 7.55E-06 | 1.63  | 1.04E-01 | 4.32  | 1.59E-05 | 7.55E-06 |
| Otu1731_Lachnospiraceae | 1.43 | 0.86  | 2.47 | 1.53E-02 | 3.90  | 1.24E-04 | 4.43  | 9.46E-06 | 9.46E-06 |
| Otu418_Lachnospiraceae  | 0.05 | 1.30  | 0.08 | 9.35E-01 | 4.51  | 1.02E-05 | 3.18  | 1.48E-03 | 1.02E-05 |
| Otu344_Lachnospiraceae  | 0.77 | 1.00  | 2.76 | 6.27E-03 | 3.37  | 8.70E-04 | 4.29  | 1.81E-05 | 1.81E-05 |
| Otu1870_Lachnospiraceae | 1.05 | 0.81  | 3.34 | 9.97E-04 | 2.77  | 6.10E-03 | 4.27  | 1.99E-05 | 1.99E-05 |
| Otu980_Lachnospiraceae  | 0.72 | 0.97  | 2.69 | 7.80E-03 | 3.42  | 7.43E-04 | 4.27  | 1.99E-05 | 1.99E-05 |
| Otu617_Lachnospiraceae  | 1.08 | 0.65  | 4.30 | 2.49E-05 | 0.97  | 3.35E-01 | 3.66  | 2.50E-04 | 2.49E-05 |
| Otu442_Lachnospiraceae  | 0.60 | 0.90  | 1.66 | 9.90E-02 | 4.12  | 5.24E-05 | 4.03  | 5.66E-05 | 5.24E-05 |
| Otu96_Lachnospiraceae   | 0.92 | 0.85  | 4.06 | 6.68E-05 | 0.84  | 4.03E-01 | 3.41  | 6.47E-04 | 6.68E-05 |
| Otu2735_Lachnospiraceae | 1.58 | 0.51  | 3.46 | 7.07E-04 | 2.20  | 2.85E-02 | 3.94  | 8.04E-05 | 8.04E-05 |
| Otu770_Lachnospiraceae  | 1.30 | 0.30  | 4.02 | 8.84E-05 | 1.18  | 2.39E-01 | 3.60  | 3.13E-04 | 8.84E-05 |
| Otu2393_Lachnospiraceae | 0.45 | 1.46  | 1.72 | 8.63E-02 | 3.84  | 1.60E-04 | 3.88  | 1.03E-04 | 1.03E-04 |
| Otu87_Lachnospiraceae   | 1.04 | 0.29  | 3.94 | 1.10E-04 | 0.59  | 5.57E-01 | 3.15  | 1.64E-03 | 1.10E-04 |
| Otu559_Lachnospiraceae  | 1.15 | 0.63  | 2.64 | 9.52E-03 | 2.81  | 5.30E-03 | 3.81  | 1.42E-04 | 1.42E-04 |
| Otu1149_Lachnospiraceae | 0.97 | -0.25 | 3.86 | 1.46E-04 | -0.31 | 7.54E-01 | -2.46 | 1.37E-02 | 1.46E-04 |
| Otu1625_Lachnospiraceae | 0.96 | 1.10  | 3.64 | 3.37E-04 | 1.65  | 9.95E-02 | 3.70  | 2.16E-04 | 2.16E-04 |
| Otu2651_Lachnospiraceae | 1.06 | 0.57  | 2.72 | 7.60E-03 | 2.57  | 1.09E-02 | 3.69  | 2.27E-04 | 2.27E-04 |
| Otu237_Lachnospiraceae  | 0.81 | 0.34  | 3.61 | 3.76E-04 | 0.43  | 6.64E-01 | 2.82  | 4.78E-03 | 3.76E-04 |
| Otu1756_Lachnospiraceae | 1.28 | 0.58  | 2.58 | 1.07E-02 | 2.46  | 1.47E-02 | 3.53  | 4.13E-04 | 4.13E-04 |
| Otu2521_Lachnospiraceae | 1.06 | 0.55  | 3.57 | 4.40E-04 | 1.41  | 1.59E-01 | 3.48  | 5.01E-04 | 4.40E-04 |
| Otu901_Lachnospiraceae  | 0.59 | 0.79  | 1.10 | 2.75E-01 | 3.53  | 5.03E-04 | 3.23  | 1.23E-03 | 5.03E-04 |
| Otu244_Lachnospiraceae  | 0.86 | 0.43  | 3.50 | 5.53E-04 | 0.96  | 3.40E-01 | 3.12  | 1.83E-03 | 5.53E-04 |
| Otu1315_Lachnospiraceae | 0.82 | 0.68  | 2.25 | 2.55E-02 | 2.66  | 8.24E-03 | 3.45  | 5.65E-04 | 5.65E-04 |
| Otu2206_Lachnospiraceae | 0.22 | 0.77  | 0.69 | 4.90E-01 | 3.48  | 5.89E-04 | 2.92  | 3.53E-03 | 5.89E-04 |
| Otu1014_Lachnospiraceae | 0.82 | 0.61  | 2.11 | 3.69E-02 | 2.74  | 6.59E-03 | 3.40  | 6.81E-04 | 6.81E-04 |
| Otu2170_Lachnospiraceae | 0.91 | 0.62  | 2.05 | 4.27E-02 | 2.78  | 5.92E-03 | 3.38  | 7.26E-04 | 7.26E-04 |

|                         |       |      |       |          |      |          |       |          |          |
|-------------------------|-------|------|-------|----------|------|----------|-------|----------|----------|
| Otu677_Lachnospiraceae  | 1.23  | 0.81 | 1.58  | 1.19E-01 | 3.16 | 1.80E-03 | 3.31  | 9.31E-04 | 9.31E-04 |
| Otu65_Lachnospiraceae   | 0.67  | 1.32 | 3.33  | 1.01E-03 | 0.75 | 4.54E-01 | 2.85  | 4.30E-03 | 1.01E-03 |
| Otu1498_Lachnospiraceae | 0.92  | 1.72 | 3.20  | 1.58E-03 | 1.39 | 1.66E-01 | 3.21  | 1.31E-03 | 1.31E-03 |
| Otu292_Lachnospiraceae  | -0.25 | 0.86 | -0.36 | 7.23E-01 | 3.19 | 1.63E-03 | -1.98 | 4.80E-02 | 1.63E-03 |
| Otu1778_Lachnospiraceae | 1.54  | 0.45 | 2.52  | 1.36E-02 | 1.97 | 5.02E-02 | 3.13  | 1.74E-03 | 1.74E-03 |
| Otu129_Lachnospiraceae  | 0.52  | 0.53 | 2.36  | 1.94E-02 | 2.04 | 4.24E-02 | 3.09  | 2.01E-03 | 2.01E-03 |
| Otu1652_Lachnospiraceae | -0.26 | 0.69 | -0.39 | 6.96E-01 | 3.12 | 2.03E-03 | -1.91 | 5.67E-02 | 2.03E-03 |
| Otu136_Lachnospiraceae  | 0.89  | 0.11 | 3.12  | 2.03E-03 | NA   | NA       | 2.87  | NA       | 2.03E-03 |
| Otu2673_Lachnospiraceae | 0.75  | 0.71 | 1.73  | 8.87E-02 | 2.68 | 7.89E-03 | 3.08  | 2.05E-03 | 2.05E-03 |
| Otu1398_Lachnospiraceae | 0.86  | 0.35 | 2.99  | 3.25E-03 | 1.41 | 1.60E-01 | 3.07  | 2.11E-03 | 2.11E-03 |
| Otu200_Lachnospiraceae  | 0.83  | 1.29 | 2.86  | 4.67E-03 | 1.47 | 1.43E-01 | 3.04  | 2.40E-03 | 2.40E-03 |
| Otu921_Lachnospiraceae  | 1.27  | 0.42 | 2.48  | 1.43E-02 | 1.85 | 6.57E-02 | 3.03  | 2.42E-03 | 2.42E-03 |
| Otu1340_Lachnospiraceae | 0.85  | 0.57 | 2.20  | 2.89E-02 | 2.05 | 4.16E-02 | 2.99  | 2.82E-03 | 2.82E-03 |
| Otu2618_Lachnospiraceae | 0.85  | 0.07 | 3.00  | 3.05E-03 | 0.28 | 7.79E-01 | 2.29  | 2.18E-02 | 3.05E-03 |
| Otu241_Lachnospiraceae  | 0.85  | 0.83 | 1.36  | 1.82E-01 | 2.88 | 4.37E-03 | 2.96  | 3.09E-03 | 3.09E-03 |
| Otu713_Lachnospiraceae  | -0.01 | 0.69 | -0.02 | 9.81E-01 | 2.98 | 3.23E-03 | -2.07 | 3.89E-02 | 3.23E-03 |
| Otu449_Lachnospiraceae  | 0.96  | 0.39 | 2.44  | 1.59E-02 | 1.72 | 8.62E-02 | 2.92  | 3.51E-03 | 3.51E-03 |
| Otu385_Anaerostipes     | 1.14  | 0.75 | 1.89  | 6.31E-02 | 3.04 | 2.67E-03 | 3.44  | 5.87E-04 | 5.87E-04 |
| Otu652_Blautia          | 1.75  | 0.27 | 4.52  | 1.29E-05 | 1.17 | 2.45E-01 | 3.91  | 9.35E-05 | 1.29E-05 |
| Otu1994_Blautia         | 1.06  | 0.61 | 2.49  | 1.40E-02 | 2.66 | 8.42E-03 | 3.60  | 3.16E-04 | 3.16E-04 |
| Otu180_Coprococcus      | 1.08  | 1.03 | 4.82  | 2.72E-06 | 3.09 | 2.27E-03 | 5.48  | 4.36E-08 | 4.36E-08 |
| Otu291_Coprococcus      | 1.30  | 0.63 | 5.14  | 7.36E-07 | 2.49 | 1.35E-02 | 5.25  | 1.53E-07 | 1.53E-07 |
| Otu908_Coprococcus      | 1.05  | 0.97 | 3.05  | 2.65E-03 | 4.23 | 3.38E-05 | 5.06  | 4.25E-07 | 4.25E-07 |
| Otu285_Coprococcus      | 0.92  | 0.88 | 3.80  | 1.93E-04 | 3.17 | 1.70E-03 | 4.86  | 1.20E-06 | 1.20E-06 |
| Otu428_Coprococcus      | 1.02  | 0.91 | 2.44  | 1.67E-02 | 4.11 | 5.50E-05 | 4.54  | 5.51E-06 | 5.51E-06 |
| Otu612_Coprococcus      | 0.60  | 0.99 | 1.42  | 1.57E-01 | 4.39 | 1.67E-05 | 4.04  | 5.25E-05 | 1.67E-05 |

|                                 |       |       |       |          |       |          |       |          |          |
|---------------------------------|-------|-------|-------|----------|-------|----------|-------|----------|----------|
| <b>Otu2686_Coprococcus</b>      | 0.57  | 0.93  | 1.92  | 5.69E-02 | 3.98  | 9.29E-05 | 4.11  | 3.96E-05 | 3.96E-05 |
| <b>Otu469_Coprococcus</b>       | 1.47  | 0.53  | 2.77  | 7.06E-03 | 2.22  | 2.73E-02 | 3.47  | 5.28E-04 | 5.28E-04 |
| <b>Otu541_Coprococcus</b>       | 0.37  | 0.76  | 1.30  | 1.94E-01 | 2.89  | 4.17E-03 | 2.94  | 3.24E-03 | 3.24E-03 |
| <b>Otu217_Lachnospira</b>       | 0.94  | 0.92  | 3.70  | 2.97E-04 | 3.84  | 1.58E-04 | 5.23  | 1.70E-07 | 1.70E-07 |
| <b>Otu470_Lachnospira</b>       | 1.22  | 0.27  | 4.07  | 7.26E-05 | 1.09  | 2.75E-01 | 3.58  | 3.47E-04 | 7.26E-05 |
| <b>Otu352_Pseudobutyrvibrio</b> | 0.96  | 0.35  | 3.31  | 1.12E-03 | 1.38  | 1.68E-01 | 3.28  | 1.05E-03 | 1.05E-03 |
| <b>Otu111_Roseburia</b>         | 1.48  | 0.11  | 5.85  | 1.65E-08 | NA    | NA       | 5.52  | NA       | 1.65E-08 |
| <b>Otu2600_Roseburia</b>        | 1.52  | 0.11  | 5.17  | 4.85E-07 | NA    | NA       | 4.90  | NA       | 4.85E-07 |
| <b>Otu247_Roseburia</b>         | -0.62 | 0.99  | -0.91 | 3.66E-01 | 3.33  | 1.01E-03 | -1.69 | 9.19E-02 | 1.01E-03 |
| <b>Otu684_Mogibacteriaceae</b>  | -1.12 | -0.46 | -2.54 | 1.22E-02 | -2.06 | 4.05E-02 | -3.22 | 1.28E-03 | 1.28E-03 |
| <b>Otu872_Peptococcaceae</b>    | -1.54 | -0.12 | -3.22 | 1.61E-03 | -0.52 | 6.02E-01 | -2.60 | 9.35E-03 | 1.61E-03 |
| <b>Otu302_Peptococcus</b>       | 0.79  | 0.72  | 1.86  | 6.77E-02 | 2.87  | 4.49E-03 | 3.30  | 9.64E-04 | 9.64E-04 |
| <b>Otu138_Ruminococcaceae</b>   | -0.74 | -0.77 | -3.90 | 1.40E-04 | -3.17 | 1.73E-03 | -4.91 | 9.21E-07 | 9.21E-07 |
| <b>Otu2072_Ruminococcaceae</b>  | 1.30  | 0.72  | 3.20  | 1.67E-03 | 3.21  | 1.53E-03 | 4.46  | 8.07E-06 | 8.07E-06 |
| <b>Otu315_Ruminococcaceae</b>   | -1.23 | -0.34 | -4.30 | 3.29E-05 | -1.48 | 1.39E-01 | -3.98 | 6.86E-05 | 3.29E-05 |
| <b>Otu318_Ruminococcaceae</b>   | -0.89 | -0.68 | -2.76 | 6.67E-03 | -3.07 | 2.42E-03 | -4.06 | 4.85E-05 | 4.85E-05 |
| <b>Otu254_Ruminococcaceae</b>   | -1.20 | -0.56 | -3.16 | 2.00E-03 | -2.50 | 1.32E-02 | -3.94 | 8.21E-05 | 8.21E-05 |
| <b>Otu1116_Ruminococcaceae</b>  | -1.17 | -0.41 | -3.65 | 3.72E-04 | -1.82 | 6.94E-02 | -3.80 | 1.44E-04 | 1.44E-04 |
| <b>Otu811_Ruminococcaceae</b>   | 1.51  | 0.62  | 2.29  | 2.36E-02 | 2.77  | 6.03E-03 | 3.54  | 3.97E-04 | 3.97E-04 |
| <b>Otu89_Ruminococcaceae</b>    | -0.67 | -0.12 | -3.38 | 8.51E-04 | -0.28 | 7.82E-01 | -2.55 | 1.06E-02 | 8.51E-04 |
| <b>Otu952_Ruminococcaceae</b>   | 1.13  | 0.55  | 2.20  | 2.90E-02 | 2.40  | 1.73E-02 | 3.23  | 1.25E-03 | 1.25E-03 |
| <b>Otu92_Ruminococcaceae</b>    | -0.57 | -0.38 | -2.98 | 3.26E-03 | -1.51 | 1.32E-01 | -3.14 | 1.67E-03 | 1.67E-03 |
| <b>Otu491_Ruminococcaceae</b>   | -0.64 | -0.53 | -2.14 | 3.41E-02 | -2.09 | 3.79E-02 | -2.97 | 3.02E-03 | 3.02E-03 |
| <b>Otu2095_Faecalibacterium</b> | 1.51  | 0.69  | 2.57  | 1.45E-02 | 2.21  | 2.77E-02 | 3.29  | 1.02E-03 | 1.02E-03 |
| <b>Otu266_Faecalibacterium</b>  | 1.17  | 0.34  | 4.36  | 2.05E-05 | 1.13  | 2.59E-01 | 3.81  | 1.39E-04 | 2.05E-05 |
| <b>Otu240_Faecalibacterium</b>  | 0.97  | 0.35  | 2.84  | 5.37E-03 | 1.56  | 1.21E-01 | 3.07  | 2.17E-03 | 2.17E-03 |



|                            |       |       |       |          |       |          |       |          |          |
|----------------------------|-------|-------|-------|----------|-------|----------|-------|----------|----------|
| Otu1484_Oscillospira       | -1.01 | -0.26 | -3.80 | 1.85E-04 | -0.50 | 6.15E-01 | -3.00 | 2.71E-03 | 1.85E-04 |
| Otu833_Oscillospira        | 1.04  | 0.49  | 3.12  | 2.08E-03 | 1.52  | 1.31E-01 | 3.25  | 1.17E-03 | 1.17E-03 |
| Otu487_Oscillospira        | -0.91 | -0.51 | -1.95 | 5.41E-02 | -2.23 | 2.65E-02 | -2.93 | 3.38E-03 | 3.38E-03 |
| Otu427_Ruminococcus        | 1.07  | 0.65  | 3.23  | 1.53E-03 | 2.77  | 6.01E-03 | 4.18  | 2.88E-05 | 2.88E-05 |
| Otu1952_Ruminococcus       | 1.38  | 0.68  | 2.81  | 5.97E-03 | 3.01  | 2.87E-03 | 4.05  | 5.07E-05 | 5.07E-05 |
| Otu521_Ruminococcus        | 0.79  | 0.84  | 3.27  | 1.25E-03 | 2.12  | 3.52E-02 | 3.77  | 1.62E-04 | 1.62E-04 |
| Otu391_Ruminococcus        | 0.53  | 1.27  | 2.03  | 4.35E-02 | 3.31  | 1.08E-03 | 3.74  | 1.84E-04 | 1.84E-04 |
| Otu328_Ruminococcus        | 0.56  | 0.65  | 2.25  | 2.57E-02 | 2.61  | 9.76E-03 | 3.41  | 6.62E-04 | 6.62E-04 |
| Otu337_Ruminococcus        | 0.71  | 0.70  | 1.69  | 9.33E-02 | 3.14  | 1.92E-03 | 3.38  | 7.24E-04 | 7.24E-04 |
| Otu1616_Ruminococcus       | 0.76  | 0.45  | 3.04  | 2.69E-03 | 1.19  | 2.37E-01 | 2.96  | 3.09E-03 | 2.69E-03 |
| Otu379_Ruminococcus        | 0.65  | 0.49  | 2.44  | 1.56E-02 | 1.76  | 7.96E-02 | 2.95  | 3.18E-03 | 3.18E-03 |
| Otu97_Anaerovibrio         | 0.65  | 0.65  | 2.09  | 3.92E-02 | 2.84  | 4.84E-03 | 3.45  | 5.60E-04 | 5.60E-04 |
| Otu181_Megasphaera         | 0.49  | -0.98 | 1.33  | 1.94E-01 | -3.12 | 2.06E-03 | 1.26  | 2.07E-01 | 2.06E-03 |
| Otu759_p-75-a5             | 1.61  | 0.25  | 3.36  | 1.04E-03 | 1.11  | 2.70E-01 | 3.10  | 1.94E-03 | 1.04E-03 |
| Otu862_Fusobacteriaceae    | -0.66 | -1.01 | -3.51 | 6.53E-04 | -4.62 | 6.31E-06 | -5.60 | 2.10E-08 | 2.10E-08 |
| Otu3_Fusobacteriaceae      | -0.59 | -0.45 | -5.06 | 9.41E-07 | -1.44 | 1.50E-01 | -4.49 | 7.29E-06 | 9.41E-07 |
| Otu840_Fusobacteriaceae    | -0.58 | -0.68 | -2.91 | 4.51E-03 | -3.01 | 2.93E-03 | -4.11 | 3.93E-05 | 3.93E-05 |
| Otu2231_Fusobacteriaceae   | -0.68 | -1.17 | -1.03 | 3.14E-01 | -3.35 | 9.34E-04 | -3.05 | 2.27E-03 | 9.34E-04 |
| Otu43_Fusobacterium        | -0.38 | -0.82 | -1.47 | 1.46E-01 | -3.12 | 2.04E-03 | -3.21 | 1.34E-03 | 1.34E-03 |
| Otu28_Fusobacterium        | -0.34 | -0.54 | -2.47 | 1.44E-02 | -1.96 | 5.17E-02 | -3.11 | 1.90E-03 | 1.90E-03 |
| Otu319_Proteobacteria      | -0.27 | -0.96 | -1.06 | 2.90E-01 | -4.21 | 3.66E-05 | -3.67 | 2.45E-04 | 3.66E-05 |
| Otu321_Betaproteobacteria  | -0.19 | -0.83 | -0.83 | 4.08E-01 | -3.18 | 1.66E-03 | -2.81 | 4.98E-03 | 1.66E-03 |
| Otu112_Desulfovibrionaceae | -0.67 | -0.81 | -3.20 | 1.62E-03 | -3.31 | 1.09E-03 | -4.54 | 5.69E-06 | 5.69E-06 |
| Otu591_Desulfovibrionaceae | -1.12 | -0.19 | -4.33 | 2.42E-05 | -0.61 | 5.42E-01 | -3.42 | 6.33E-04 | 2.42E-05 |
| Otu199_Enterobacteriaceae  | -0.10 | -0.69 | -0.36 | 7.20E-01 | -2.98 | 3.22E-03 | -2.34 | 1.94E-02 | 3.22E-03 |
| Otu2813_Treponema          | 0.82  | 0.51  | 2.30  | 2.34E-02 | 2.30  | 2.23E-02 | 3.22  | 1.28E-03 | 1.28E-03 |

|                           |       |       |       |          |       |          |       |          |          |
|---------------------------|-------|-------|-------|----------|-------|----------|-------|----------|----------|
| <b>Otu1005_Treponema</b>  | 0.70  | 0.44  | 2.72  | 7.22E-03 | 1.71  | 8.95E-02 | 3.10  | 1.93E-03 | 1.93E-03 |
| <b>Otu437_Anaeroplasm</b> | 0.46  | 0.91  | 0.70  | 4.84E-01 | 3.65  | 3.23E-04 | 3.04  | 2.38E-03 | 3.23E-04 |
| <b>Otu527_RF39</b>        | 1.24  | 0.77  | 2.63  | 9.77E-03 | 3.50  | 5.54E-04 | 4.27  | 1.97E-05 | 1.97E-05 |
| <b>Otu484_RF39</b>        | 1.79  | 0.50  | 3.07  | 3.00E-03 | 2.07  | 3.93E-02 | 3.56  | 3.77E-04 | 3.77E-04 |
| <b>Otu1146_RF39</b>       | 1.63  | 0.60  | 2.34  | 2.13E-02 | 2.71  | 7.27E-03 | 3.53  | 4.22E-04 | 4.22E-04 |
| <b>Otu249_RF39</b>        | 0.68  | 0.51  | 2.50  | 1.40E-02 | 2.29  | 2.26E-02 | 3.35  | 8.11E-04 | 8.11E-04 |
| <b>Otu278_RFP12</b>       | -0.52 | -0.80 | -2.61 | 9.57E-03 | -2.03 | 4.38E-02 | -3.26 | 1.12E-03 | 1.12E-03 |
| <b>Otu311_RFP12</b>       | -0.62 | -0.34 | -2.99 | 3.21E-03 | -1.30 | 1.94E-01 | -3.00 | 2.68E-03 | 2.68E-03 |

**Supplementary table 2: OTUs significantly associated with total cholesterol (TC)**

| <b>ID</b>                         | <b>Estimate_q</b> | <b>Estimate_b</b> | <b>T_value_q</b> | <b>P_value_q</b> | <b>T_value_b</b> | <b>P_value_b</b> | <b>meta_z_score</b> | <b>P_meta</b> | <b>final_p_value</b> |
|-----------------------------------|-------------------|-------------------|------------------|------------------|------------------|------------------|---------------------|---------------|----------------------|
| <b>Otu307_Treponema</b>           | 0.02              | -0.27             | 0.41             | 6.81E-01         | -5.4             | 1.51E-07         | 3.42                | 6.20E-04      | 1.51E-07             |
| <b>Otu1069_Treponema</b>          | -0.03             | -0.18             | -0.53            | 5.95E-01         | -4.0             | 8.02E-05         | -3.16               | 1.55E-03      | 8.02E-05             |
| <b>Otu169_Prevotella</b>          | -0.02             | -0.19             | -0.45            | 6.55E-01         | -4.0             | 8.72E-05         | -3.09               | 2.00E-03      | 8.72E-05             |
| <b>Otu2043_Ruminococcaceae</b>    | -0.09             | -0.18             | -0.77            | 4.43E-01         | -4.0             | 9.17E-05         | -3.31               | 9.40E-04      | 9.17E-05             |
| <b>Otu68_Prevotella_stercorea</b> | 0.02              | 0.19              | 0.76             | 4.48E-01         | 3.9              | 1.46E-04         | 3.22                | 1.27E-03      | 1.46E-04             |
| <b>Otu1047_Treponema</b>          | 0.02              | -0.24             | 0.64             | 5.23E-01         | -3.7             | 2.51E-04         | 2.14                | 3.26E-02      | 2.51E-04             |
| <b>Otu2306_Ruminococcaceae</b>    | -0.23             | -0.13             | -4.77            | 4.04E-06         | -2.8             | 5.37E-03         | -5.23               | 1.71E-07      | 1.71E-07             |
| <b>Otu13_Lactobacillus</b>        | -0.09             | -0.22             | -3.44            | 6.83E-04         | -2.5             | 1.33E-02         | -4.15               | 3.29E-05      | 3.29E-05             |
| <b>Otu521_Ruminococcus</b>        | -0.12             | -0.25             | -2.58            | 1.06E-02         | -3.3             | 1.32E-03         | -4.08               | 4.55E-05      | 4.55E-05             |
| <b>Otu2206_Lachnospiraceae</b>    | 0.12              | 0.15              | 2.21             | 2.90E-02         | 3.6              | 3.91E-04         | 4.05                | 5.09E-05      | 5.09E-05             |
| <b>Otu1457_Ruminococcus</b>       | -0.20             | -0.14             | -2.43            | 1.66E-02         | -3.3             | 9.57E-04         | -4.03               | 5.58E-05      | 5.58E-05             |
| <b>Otu456_Ruminococcaceae</b>     | 0.17              | 0.14              | 2.63             | 9.42E-03         | 3.0              | 3.30E-03         | 3.91                | 9.08E-05      | 9.08E-05             |
| <b>Otu350_Ruminococcus</b>        | -0.14             | -0.13             | -2.90            | 4.18E-03         | -2.5             | 1.22E-02         | -3.80               | 1.46E-04      | 1.46E-04             |
| <b>Otu117_Ruminococcaceae</b>     | -0.18             | 0.03              | -4.20            | 3.77E-05         | 0.2              | 8.78E-01         | 2.81                | 5.03E-03      | 3.77E-05             |
| <b>Otu127_GMD14H09</b>            | 0.14              | 0.04              | 3.70             | 2.85E-04         | 0.8              | 4.21E-01         | 3.13                | 1.72E-03      | 2.85E-04             |

**Supplementary table 3: OTUs significantly associated with ratio of low density lipoprotein to high density lipoprotein (LDL/HDL)**

| ID                          | Estimate_q | Estimate_b | T_value_q | P_value_q | T_value_b | P_value_b | meta_z_score | P_meta   | final_p_value |
|-----------------------------|------------|------------|-----------|-----------|-----------|-----------|--------------|----------|---------------|
| Otu30_Bacteroidetes         | -0.11      | -1.14      | -2.57     | 1.08E-02  | -5.26     | 3.17E-07  | -5.42        | 6.05E-08 | 6.05E-08      |
| Otu862_Fusobacteriaceae     | 0.25       | 0.34       | 3.09      | 2.52E-03  | 4.60      | 6.97E-06  | 5.31         | 1.07E-07 | 1.07E-07      |
| Otu199_Enterobacteriaceae   | 0.36       | 0.22       | 4.01      | 1.31E-04  | 2.85      | 4.74E-03  | 4.70         | 2.58E-06 | 2.58E-06      |
| Otu3_Fusobacteriaceae       | 0.19       | 0.16       | 4.75      | 3.94E-06  | 1.47      | 1.44E-01  | 4.30         | 1.73E-05 | 3.94E-06      |
| Otu328_Ruminococcus         | -0.02      | -0.39      | -0.24     | 8.14E-01  | -4.63     | 6.14E-06  | -3.36        | 7.69E-04 | 6.14E-06      |
| Otu33_Clostridium_butyricum | -0.36      | -0.29      | -4.51     | 1.05E-05  | -1.16     | 2.46E-01  | -3.94        | 8.27E-05 | 1.05E-05      |
| Otu43_Fusobacterium         | 0.28       | 0.35       | 2.36      | 2.22E-02  | 3.95      | 1.05E-04  | 4.36         | 1.30E-05 | 1.30E-05      |
| Otu231_Clostridiaceae       | -0.36      | -0.22      | -4.42     | 1.53E-05  | -0.51     | 6.11E-01  | -3.42        | 6.32E-04 | 1.53E-05      |
| Otu394_Epulopiscium         | -0.07      | -0.41      | -0.82     | 4.11E-01  | -4.38     | 1.78E-05  | -3.62        | 2.99E-04 | 1.78E-05      |
| Otu2813_Treponema           | -0.25      | -0.28      | -2.36     | 1.99E-02  | -3.75     | 2.25E-04  | -4.26        | 2.09E-05 | 2.09E-05      |
| Otu2402_Treponema           | -0.38      | -0.17      | -3.89     | 1.53E-04  | -2.21     | 2.79E-02  | -4.23        | 2.32E-05 | 2.32E-05      |
| Otu259_Oscillospira         | 0.29       | 0.27       | 3.09      | 2.31E-03  | 2.80      | 5.51E-03  | 4.12         | 3.83E-05 | 3.83E-05      |
| Otu15_Clostridium           | -0.36      | 0.04       | -4.13     | 4.94E-05  | NA        | NA        | -3.89        | NA       | 4.94E-05      |
| Otu1922_Treponema           | -0.26      | -0.27      | -2.22     | 2.83E-02  | -3.59     | 4.08E-04  | -4.05        | 5.12E-05 | 5.12E-05      |
| Otu151_Prevotella           | -0.05      | -0.39      | -0.73     | 4.69E-01  | -4.06     | 6.73E-05  | -3.33        | 8.67E-04 | 6.73E-05      |
| Otu1384_Ruminococcaceae     | 0.51       | 0.14       | 3.93      | 1.28E-04  | 1.78      | 7.66E-02  | 3.96         | 7.48E-05 | 7.48E-05      |
| Otu47_Prevotella            | -0.05      | 0.33       | -0.45     | 6.51E-01  | 3.99      | 8.75E-05  | -2.45        | 1.41E-02 | 8.75E-05      |
| Otu1014_Lachnospiraceae     | 0.11       | -0.30      | 1.15      | 2.51E-01  | -3.99     | 8.85E-05  | 1.96         | 5.00E-02 | 8.85E-05      |
| Otu45_Treponema             | -0.20      | -0.14      | -3.99     | 8.88E-05  | -1.04     | 3.00E-01  | -3.50        | 4.58E-04 | 8.88E-05      |
| Otu101_Epulopiscium         | 0.31       | 0.26       | 2.33      | 2.27E-02  | 3.30      | 1.13E-03  | 3.91         | 9.10E-05 | 9.10E-05      |
| Otu1410_Treponema           | -0.34      | -0.15      | -3.84     | 1.73E-04  | -1.76     | 7.90E-02  | -3.90        | 9.73E-05 | 9.73E-05      |
| Otu193_Mogibacteriaceae     | 0.32       | 0.64       | 3.88      | 1.34E-04  | 1.52      | 1.30E-01  | 3.77         | 1.63E-04 | 1.34E-04      |
| Otu5_Escherichia            | 0.16       | 0.27       | 3.87      | 1.42E-04  | 1.33      | 1.86E-01  | 3.63         | 2.88E-04 | 1.42E-04      |
| Otu1975_Treponema           | -0.25      | -0.22      | -2.63     | 9.45E-03  | -2.79     | 5.73E-03  | -3.79        | 1.51E-04 | 1.51E-04      |

|                                     |       |       |       |          |       |          |       |          |          |
|-------------------------------------|-------|-------|-------|----------|-------|----------|-------|----------|----------|
| <b>Otu366_Anaeroplasma</b>          | -0.32 | -0.19 | -2.99 | 3.44E-03 | -2.43 | 1.56E-02 | -3.78 | 1.58E-04 | 1.58E-04 |
| <b>Otu17_Phacolarctobacterium</b>   | 0.36  | 0.04  | 3.80  | 1.87E-04 | NA    | NA       | 3.56  | NA       | 1.87E-04 |
| <b>Otu13_Lactobacillus</b>          | -0.18 | -0.10 | -3.78 | 2.02E-04 | -0.62 | 5.33E-01 | -3.07 | 2.15E-03 | 2.02E-04 |
| <b>Otu16_Treponema</b>              | -0.13 | -0.42 | -2.79 | 5.77E-03 | -2.47 | 1.41E-02 | -3.69 | 2.26E-04 | 2.26E-04 |
| <b>Otu1047_Treponema</b>            | -0.11 | -0.38 | -1.92 | 5.62E-02 | -3.34 | 9.84E-04 | -3.68 | 2.33E-04 | 2.33E-04 |
| <b>Otu2022_Ruminococcus</b>         | 0.16  | -0.29 | 1.20  | 2.34E-01 | -3.73 | 2.40E-04 | 1.76  | 7.91E-02 | 2.40E-04 |
| <b>Otu188_Bacteroides_fragilis</b>  | 0.10  | 0.31  | 0.65  | 5.21E-01 | 3.68  | 2.85E-04 | 3.02  | 2.53E-03 | 2.85E-04 |
| <b>Otu649_Mogibacteriaceae</b>      | 0.15  | 0.28  | 0.78  | 4.35E-01 | 3.68  | 2.86E-04 | 3.12  | 1.83E-03 | 2.86E-04 |
| <b>Otu1151_Prevotella</b>           | -0.17 | -0.46 | -2.17 | 3.10E-02 | -3.00 | 2.99E-03 | -3.62 | 2.89E-04 | 2.89E-04 |
| <b>Otu485_Epulopiscium</b>          | -0.04 | -0.30 | -0.37 | 7.13E-01 | -3.65 | 3.20E-04 | -2.80 | 5.03E-03 | 3.20E-04 |
| <b>Otu1616_Ruminococcus</b>         | -0.29 | -0.12 | -3.66 | 3.20E-04 | -0.94 | 3.46E-01 | -3.21 | 1.32E-03 | 3.20E-04 |
| <b>Otu42_Actinobacillus</b>         | 0.19  | 0.19  | 2.66  | 8.89E-03 | 2.48  | 1.38E-02 | 3.59  | 3.29E-04 | 3.29E-04 |
| <b>Otu186_Prevotella</b>            | -0.16 | -0.38 | -2.38 | 1.84E-02 | -2.74 | 6.59E-03 | -3.59 | 3.32E-04 | 3.32E-04 |
| <b>Otu2674_Parabacteroides</b>      | 0.42  | 0.04  | 3.63  | 3.48E-04 | NA    | NA       | 3.39  | NA       | 3.48E-04 |
| <b>Otu2502_Lachnospiraceae</b>      | -0.16 | -0.30 | -1.71 | 8.89E-02 | -3.40 | 8.04E-04 | -3.57 | 3.53E-04 | 3.53E-04 |
| <b>Otu442_Lachnospiraceae</b>       | -0.01 | -0.27 | -0.14 | 8.91E-01 | -3.60 | 3.82E-04 | -2.61 | 9.09E-03 | 3.82E-04 |
| <b>Otu1800_Parabacteroides</b>      | 0.39  | 0.20  | 3.60  | 3.87E-04 | 0.88  | 3.81E-01 | 3.13  | 1.76E-03 | 3.87E-04 |
| <b>Otu135_CF231</b>                 | 0.28  | 0.24  | 2.42  | 1.86E-02 | 2.68  | 7.94E-03 | 3.54  | 3.98E-04 | 3.98E-04 |
| <b>Otu111_Roseburia</b>             | -0.32 | 0.04  | -3.59 | 3.99E-04 | NA    | NA       | -3.35 | NA       | 3.99E-04 |
| <b>Otu291_Coprococcus</b>           | 0.00  | -0.30 | 0.01  | 9.91E-01 | -3.58 | 4.15E-04 | 2.49  | 1.28E-02 | 4.15E-04 |
| <b>Otu31_Treponema</b>              | -0.24 | -0.30 | -3.57 | 4.28E-04 | -1.00 | 3.19E-01 | -3.19 | 1.40E-03 | 4.28E-04 |
| <b>Otu104_Lactobacillus_reuteri</b> | -0.11 | -0.52 | -2.03 | 4.39E-02 | -2.98 | 3.14E-03 | -3.51 | 4.42E-04 | 4.42E-04 |
| <b>Otu2449_Lachnospiraceae</b>      | -0.05 | -0.39 | -0.54 | 5.88E-01 | -3.56 | 4.47E-04 | -2.87 | 4.16E-03 | 4.47E-04 |
| <b>Otu2562_Mogibacteriaceae</b>     | 0.32  | 0.22  | 3.36  | 9.08E-04 | 1.65  | 1.00E-01 | 3.51  | 4.52E-04 | 4.52E-04 |
| <b>Otu350_Ruminococcus</b>          | -0.23 | -0.22 | -2.47 | 1.45E-02 | -2.52 | 1.25E-02 | -3.49 | 4.76E-04 | 4.76E-04 |
| <b>Otu2306_Ruminococcaceae</b>      | -0.09 | -0.29 | -1.03 | 3.04E-01 | -3.53 | 4.98E-04 | -3.19 | 1.43E-03 | 4.98E-04 |

|                                |       |       |       |          |       |          |       |          |          |
|--------------------------------|-------|-------|-------|----------|-------|----------|-------|----------|----------|
| Otu468_Ruminococcus            | -0.04 | -0.26 | -0.43 | 6.65E-01 | -3.50 | 5.57E-04 | -2.75 | 6.01E-03 | 5.57E-04 |
| Otu2768_Clostridiaceae         | -0.12 | -0.27 | -1.03 | 3.04E-01 | -3.50 | 5.61E-04 | -3.17 | 1.54E-03 | 5.61E-04 |
| Otu816_Peptococcaceae          | 0.03  | 0.26  | 0.16  | 8.69E-01 | 3.47  | 6.11E-04 | 2.54  | 1.11E-02 | 6.11E-04 |
| Otu32_Bacteroides_coprophilus  | 0.11  | 0.26  | 1.47  | 1.45E-01 | 3.43  | 7.16E-04 | 3.42  | 6.17E-04 | 6.17E-04 |
| Otu141_S24-7                   | 0.20  | -0.23 | 3.44  | 6.96E-04 | -0.66 | 5.08E-01 | -1.93 | 5.36E-02 | 6.96E-04 |
| Otu2231_Fusobacteriaceae       | 0.50  | 0.38  | 1.66  | 1.10E-01 | 3.21  | 1.49E-03 | 3.38  | 7.36E-04 | 7.36E-04 |
| Otu44_Prevotella               | -0.14 | -0.38 | -2.56 | 1.11E-02 | -2.25 | 2.55E-02 | -3.37 | 7.39E-04 | 7.39E-04 |
| Otu1423_Treponema              | -0.42 | -0.13 | -3.33 | 1.07E-03 | -1.50 | 1.35E-01 | -3.37 | 7.51E-04 | 7.51E-04 |
| Otu195_Pasteurellaceae         | 0.28  | 0.21  | 2.22  | 2.95E-02 | 2.60  | 9.82E-03 | 3.37  | 7.65E-04 | 7.65E-04 |
| Otu575_Ruminococcaceae         | 0.00  | -0.26 | -0.01 | 9.93E-01 | -3.41 | 7.69E-04 | -2.38 | 1.71E-02 | 7.69E-04 |
| Otu872_Peptococcaceae          | 0.27  | 0.24  | 1.60  | 1.11E-01 | 3.19  | 1.59E-03 | 3.36  | 7.80E-04 | 7.80E-04 |
| Otu106_Ruminococcus            | -0.15 | -0.25 | -2.44 | 1.54E-02 | -2.34 | 2.02E-02 | -3.36 | 7.91E-04 | 7.91E-04 |
| Otu161_rc4-4                   | 0.29  | 0.32  | 3.38  | 8.36E-04 | 1.39  | 1.66E-01 | 3.34  | 8.30E-04 | 8.30E-04 |
| Otu89_Ruminococcaceae          | 0.23  | 0.10  | 3.38  | 8.64E-04 | 0.68  | 4.96E-01 | 2.84  | 4.55E-03 | 8.64E-04 |
| Otu413_Lachnospiraceae         | 0.06  | -0.25 | 0.47  | 6.43E-01 | -3.35 | 9.36E-04 | 2.01  | 4.42E-02 | 9.36E-04 |
| Otu756_Dethiosulfovibrionaceae | 0.28  | 0.23  | 2.03  | 4.40E-02 | 2.69  | 7.69E-03 | 3.31  | 9.38E-04 | 9.38E-04 |
| Otu243_Lachnospiraceae         | -0.29 | 0.01  | -3.36 | 9.72E-04 | 0.16  | 8.71E-01 | 2.22  | 2.66E-02 | 9.72E-04 |
| Otu2633_Phascalactobacterium   | 0.29  | 0.01  | 3.31  | 1.09E-03 | 0.11  | 9.10E-01 | 2.39  | 1.69E-02 | 1.09E-03 |
| Otu276_Ruminococcaceae         | 0.28  | 0.22  | 1.81  | 7.35E-02 | 2.84  | 4.89E-03 | 3.26  | 1.13E-03 | 1.13E-03 |
| Otu683_Ruminococcaceae         | -0.36 | -0.18 | -2.31 | 2.29E-02 | -2.34 | 2.00E-02 | -3.25 | 1.14E-03 | 1.14E-03 |
| Otu432_Ruminococcus            | -0.32 | 0.33  | -1.33 | 1.92E-01 | 3.29  | 1.14E-03 | -1.38 | 1.69E-01 | 1.14E-03 |
| Otu1069_Treponema              | -0.27 | -0.19 | -2.34 | 2.04E-02 | -2.28 | 2.34E-02 | -3.24 | 1.18E-03 | 1.18E-03 |
| Otu596_Clostridiales           | -0.02 | -0.25 | -0.20 | 8.45E-01 | -3.25 | 1.33E-03 | -2.41 | 1.61E-02 | 1.33E-03 |

**Supplementary table 4: OTUs significantly associated with atherosclerosis index (AI)**

| ID                             | Estimate_q | Estimate_b | T_value_q | P_value_q | T_value_b | P_value_b | meta_z_score | P_meta   | final_p_value |
|--------------------------------|------------|------------|-----------|-----------|-----------|-----------|--------------|----------|---------------|
| Otu862_Fusobacteriaceae        | 0.31       | 0.40       | 3.09      | 2.53E-03  | 4.22      | 3.5E-05   | 5.06         | 4.11E-07 | 4.11E-07      |
| Otu13_Lactobacillus            | -0.30      | -0.32      | -5.08     | 7.96E-07  | -1.58     | 1.1E-01   | -4.61        | 4.12E-06 | 7.96E-07      |
| Otu30_Bacteroidetes            | -0.17      | -1.08      | -3.00     | 3.00E-03  | -3.78     | 2.0E-04   | -4.73        | 2.22E-06 | 2.22E-06      |
| Otu104_Lactobacillus_reuteri   | -0.24      | -0.71      | -3.42     | 7.32E-04  | -3.20     | 1.6E-03   | -4.62        | 3.79E-06 | 3.79E-06      |
| Otu350_Ruminococcus            | -0.34      | -0.39      | -3.03     | 2.79E-03  | -3.43     | 7.0E-04   | -4.51        | 6.46E-06 | 6.46E-06      |
| Otu328_Ruminococcus            | 0.01       | -0.49      | 0.14      | 8.86E-01  | -4.61     | 6.7E-06   | 3.08         | 2.05E-03 | 6.69E-06      |
| Otu15_Clostridium              | -0.51      | 0.05       | -4.58     | 7.55E-06  | NA        | NA        | -4.33        | NA       | 7.55E-06      |
| Otu2633_Phascolartobacterium   | 0.50       | 0.05       | 4.59      | 7.74E-06  | 0.30      | 7.7E-01   | 3.37         | 7.44E-04 | 7.74E-06      |
| Otu394_Epulopiscium            | -0.15      | -0.55      | -1.33     | 1.85E-01  | -4.52     | 9.7E-06   | -4.07        | 4.76E-05 | 9.66E-06      |
| Otu231_Clostridiaceae          | -0.46      | -0.11      | -4.48     | 1.16E-05  | -0.20     | 8.4E-01   | -3.24        | 1.19E-03 | 1.16E-05      |
| Otu17_Phascolartobacterium     | 0.54       | 0.05       | 4.48      | 1.18E-05  | NA        | NA        | 4.23         | NA       | 1.18E-05      |
| Otu106_Ruminococcus            | -0.26      | -0.39      | -3.22     | 1.51E-03  | -2.84     | 4.9E-03   | -4.23        | 2.29E-05 | 2.29E-05      |
| Otu3_Fusobacteriaceae          | 0.22       | 0.19       | 4.32      | 2.40E-05  | 1.42      | 1.6E-01   | 3.99         | 6.66E-05 | 2.40E-05      |
| Otu199_Enterobacteriaceae      | 0.39       | 0.26       | 3.49      | 7.54E-04  | 2.61      | 9.8E-03   | 4.21         | 2.56E-05 | 2.56E-05      |
| Otu135_CF231                   | 0.40       | 0.32       | 3.21      | 2.19E-03  | 2.88      | 4.4E-03   | 4.18         | 2.90E-05 | 2.90E-05      |
| Otu816_Peptococcaceae          | 0.00       | 0.40       | 0.01      | 9.91E-01  | 4.22      | 3.4E-05   | 2.94         | 3.31E-03 | 3.44E-05      |
| Otu2306_Ruminococcaceae        | -0.23      | -0.41      | -2.05     | 4.17E-02  | -3.84     | 1.6E-04   | -4.11        | 3.96E-05 | 3.96E-05      |
| Otu756_Dethiosulfovibrionaceae | 0.41       | 0.38       | 2.38      | 1.84E-02  | 3.49      | 5.8E-04   | 4.10         | 4.15E-05 | 4.15E-05      |
| Otu1616_Ruminococcus           | -0.44      | -0.08      | -4.13     | 5.13E-05  | -0.50     | 6.2E-01   | -3.22        | 1.29E-03 | 5.13E-05      |
| Otu43_Fusobacterium            | 0.31       | 0.39       | 2.39      | 2.06E-02  | 3.41      | 7.7E-04   | 4.02         | 5.94E-05 | 5.94E-05      |
| Otu141_S24-7                   | 0.31       | -0.12      | 4.06      | 6.82E-05  | -0.27     | 7.9E-01   | -2.63        | 8.59E-03 | 6.82E-05      |
| Otu16_Treponema                | -0.16      | -0.61      | -2.71     | 7.21E-03  | -2.85     | 4.7E-03   | -3.90        | 9.67E-05 | 9.67E-05      |
| Otu33_Clostridium_butyricum    | -0.41      | -0.34      | -3.96     | 1.01E-04  | -1.08     | 2.8E-01   | -3.51        | 4.50E-04 | 1.01E-04      |
| Otu2022_Ruminococcus           | -0.06      | -0.39      | -0.29     | 7.69E-01  | -3.94     | 1.1E-04   | -2.94        | 3.23E-03 | 1.08E-04      |

|                               |       |       |       |          |       |         |       |          |          |
|-------------------------------|-------|-------|-------|----------|-------|---------|-------|----------|----------|
| Otu123_                       | 0.32  | -0.03 | 3.92  | 1.18E-04 | -0.11 | 9.1E-01 | -2.64 | 8.21E-03 | 1.18E-04 |
| Otu366_Anaeroplasm            | -0.44 | -0.24 | -3.04 | 2.96E-03 | -2.49 | 1.4E-02 | -3.85 | 1.20E-04 | 1.20E-04 |
| Otu47_Prevotella              | -0.13 | 0.42  | -1.01 | 3.15E-01 | 3.90  | 1.3E-04 | -2.00 | 4.55E-02 | 1.26E-04 |
| Otu376_Ruminococcus           | -0.32 | -0.42 | -2.52 | 1.24E-02 | -2.93 | 3.7E-03 | -3.82 | 1.35E-04 | 1.35E-04 |
| Otu872_Peptococcaceae         | 0.17  | 0.37  | 0.79  | 4.31E-01 | 3.81  | 1.8E-04 | 3.21  | 1.33E-03 | 1.77E-04 |
| Otu1749_Phascolarctobacterium | 0.29  | 0.16  | 3.80  | 1.86E-04 | 1.00  | 3.2E-01 | 3.35  | 8.18E-04 | 1.86E-04 |
| Otu1432_Lactobacillus_reuteri | -0.30 | -0.28 | -3.59 | 4.09E-04 | -1.74 | 8.3E-02 | -3.73 | 1.94E-04 | 1.94E-04 |
| Otu1047_Treponema             | -0.07 | -0.54 | -0.96 | 3.37E-01 | -3.77 | 2.1E-04 | -3.30 | 9.64E-04 | 2.09E-04 |
| Otu1014_Lachnospiraceae       | 0.10  | -0.36 | 0.76  | 4.49E-01 | -3.72 | 2.5E-04 | 2.05  | 4.01E-02 | 2.53E-04 |
| Otu151_Prevotella             | -0.06 | -0.46 | -0.68 | 4.96E-01 | -3.71 | 2.6E-04 | -3.07 | 2.18E-03 | 2.59E-04 |
| Otu161_rc4-4                  | 0.39  | 0.49  | 3.51  | 5.31E-04 | 1.66  | 9.8E-02 | 3.62  | 2.94E-04 | 2.94E-04 |
| Otu101_Epulopiscium           | 0.44  | 0.25  | 2.76  | 7.19E-03 | 2.43  | 1.6E-02 | 3.60  | 3.14E-04 | 3.14E-04 |
| Otu139_Desulfovibrio          | 0.23  | 0.41  | 2.48  | 1.41E-02 | 2.64  | 8.9E-03 | 3.59  | 3.36E-04 | 3.36E-04 |
| Otu42_Actinobacillus          | 0.23  | 0.24  | 2.61  | 1.01E-02 | 2.42  | 1.6E-02 | 3.52  | 4.31E-04 | 4.31E-04 |
| Otu5_Escherichia              | 0.19  | 0.32  | 3.56  | 4.57E-04 | 1.23  | 2.2E-01 | 3.35  | 8.11E-04 | 4.57E-04 |
| Otu195_Pasteurellaceae        | 0.38  | 0.26  | 2.55  | 1.27E-02 | 2.47  | 1.4E-02 | 3.49  | 4.75E-04 | 4.75E-04 |
| Otu591_Desulfovibrionaceae    | 0.24  | 0.40  | 1.93  | 5.49E-02 | 3.05  | 2.5E-03 | 3.49  | 4.79E-04 | 4.79E-04 |
| Otu2402_Treponema             | -0.32 | -0.24 | -2.60 | 1.04E-02 | -2.39 | 1.8E-02 | -3.49 | 4.82E-04 | 4.82E-04 |
| Otu145_S24-7                  | 0.28  | 0.20  | 3.52  | 5.15E-04 | 0.96  | 3.4E-01 | 3.13  | 1.74E-03 | 5.15E-04 |
| Otu38_Lactobacillus           | -0.25 | 0.03  | -3.52 | 5.25E-04 | 0.12  | 9.1E-01 | 2.37  | 1.79E-02 | 5.25E-04 |
| Otu645_Clostridiales          | -0.08 | -0.36 | -0.36 | 7.21E-01 | -3.51 | 5.3E-04 | -2.70 | 6.90E-03 | 5.34E-04 |
| Otu1423_Treponema             | -0.59 | -0.13 | -3.52 | 5.49E-04 | -1.22 | 2.2E-01 | -3.31 | 9.48E-04 | 5.49E-04 |
| Otu410_YS2                    | 0.52  | 0.22  | 2.93  | 4.51E-03 | 2.03  | 4.3E-02 | 3.44  | 5.91E-04 | 5.91E-04 |
| Otu575_Ruminococcaceae        | -0.17 | -0.35 | -0.96 | 3.41E-01 | -3.48 | 5.9E-04 | -3.10 | 1.92E-03 | 5.94E-04 |
| Otu1384_Ruminococcaceae       | 0.57  | 0.08  | 3.50  | 5.99E-04 | 0.79  | 4.3E-01 | 2.99  | 2.81E-03 | 5.99E-04 |
| Otu208_CF231                  | 0.32  | 0.34  | 3.20  | 1.57E-03 | 1.69  | 9.2E-02 | 3.43  | 6.10E-04 | 6.10E-04 |

|                         |       |       |       |          |       |         |       |          |          |
|-------------------------|-------|-------|-------|----------|-------|---------|-------|----------|----------|
| Otu257_Prevotella       | 0.31  | 0.23  | 2.60  | 1.04E-02 | 2.29  | 2.3E-02 | 3.42  | 6.28E-04 | 6.28E-04 |
| Otu171_Prevotella       | -0.26 | -0.23 | -3.05 | 2.62E-03 | -1.77 | 7.7E-02 | -3.38 | 7.32E-04 | 7.32E-04 |
| Otu649_Mogibacteriaceae | 0.17  | 0.33  | 0.73  | 4.69E-01 | 3.41  | 7.6E-04 | 2.89  | 3.81E-03 | 7.56E-04 |
| Otu1975_Treponema       | -0.31 | -0.25 | -2.35 | 2.00E-02 | -2.45 | 1.5E-02 | -3.36 | 7.69E-04 | 7.69E-04 |
| Otu2813_Treponema       | -0.14 | -0.33 | -1.04 | 3.00E-01 | -3.40 | 7.9E-04 | -3.10 | 1.91E-03 | 7.94E-04 |
| Otu2768_Clostridiaceae  | -0.15 | -0.34 | -1.02 | 3.07E-01 | -3.38 | 8.3E-04 | -3.08 | 2.04E-03 | 8.35E-04 |
| Otu2709_Prevotella      | 0.22  | 0.30  | 2.62  | 9.35E-03 | 2.13  | 3.4E-02 | 3.33  | 8.54E-04 | 8.54E-04 |
| Otu468_Ruminococcus     | -0.06 | -0.33 | -0.54 | 5.90E-01 | -3.36 | 9.0E-04 | -2.73 | 6.35E-03 | 8.96E-04 |
| Otu118_Bacteroidales    | 0.29  | 0.21  | 2.74  | 6.82E-03 | 1.99  | 4.8E-02 | 3.31  | 9.27E-04 | 9.27E-04 |
| Otu454_Mogibacteriaceae | 0.38  | 0.28  | 2.50  | 1.32E-02 | 2.20  | 2.8E-02 | 3.30  | 9.58E-04 | 9.58E-04 |
| Otu57_CF231             | 0.33  | -0.03 | 3.35  | 1.07E-03 | -0.34 | 7.3E-01 | -2.07 | 3.84E-02 | 1.07E-03 |
| Otu31_Treponema         | -0.28 | -0.39 | -3.31 | 1.07E-03 | -1.00 | 3.2E-01 | -3.02 | 2.53E-03 | 1.07E-03 |

**Supplementary table 5:** taxonomies significantly associated with blood glucose

| Taxonomy                                          | Estimate_q | Estimate_b | T_value_q | P_value_q | T_value_b | P_value_b | meta_z_score | GLU_P_meta | final_p_value |
|---------------------------------------------------|------------|------------|-----------|-----------|-----------|-----------|--------------|------------|---------------|
| g_Coprococcus                                     | 1.69       | 0.11       | 6.11      | 4.11E-09  | NA        | NA        | 5.88         | NA         | 4.11E-09      |
| g_Roseburia                                       | 1.68       | 0.11       | 5.99      | 7.75E-09  | NA        | NA        | 5.77         | NA         | 7.75E-09      |
| f_Lachnospiraceae/Lachnospira                     | 2.23       | 0.11       | 5.77      | 2.42E-08  | NA        | NA        | 5.58         | NA         | 2.42E-08      |
| g_Faecalibacterium                                | 1.05       | 0.18       | 3.81      | 1.79E-04  | 0.49      | 0.62      | 3.75         | 2.74E-03   | 1.79E-04      |
| o_Turicibacterales/Turicibacteraceae/Turicibacter | 0.82       | 1.39       | 3.62      | 3.56E-04  | 1.59      | 0.11      | 3.64         | 2.70E-04   | 2.70E-04      |
| g_Peptococcus                                     | 1.24       | 0.85       | 1.98      | 5.38E-02  | 3.14      | 0.00      | 3.56         | 3.75E-04   | 3.75E-04      |
| f_Enterococcaceae                                 | 1.69       | -1.39      | 1.43      | 1.72E-01  | -3.31     | 0.00      | 3.27         | 1.78E-01   | 1.07E-03      |
| g_Clostridium                                     | 0.06       | 0.78       | 0.06      | 9.55E-01  | 3.19      | 0.00      | 3.15         | 2.31E-02   | 1.61E-03      |
| g_Pseudobutyrvibrio                               | 0.63       | 0.67       | 1.38      | 1.70E-01  | 3.03      | 0.00      | 3.09         | 2.00E-03   | 2.00E-03      |
| g_Mogibacterium                                   | -1.30      | -0.54      | -2.08     | 4.12E-02  | -2.29     | 0.02      | -3.05        | 2.27E-03   | 2.27E-03      |
| o_Actinomycetales                                 | -0.93      | -0.52      | -2.18     | 3.14E-02  | -2.32     | 0.02      | -3.15        | 1.63E-03   | 1.63E-03      |



| Taxonomy                                                             | Estimate_q | Estimate_b | T_value_q | P_value_q | T_value_b | P_value_b | meta_z_score | GLU_P_meta | final_p_value |
|----------------------------------------------------------------------|------------|------------|-----------|-----------|-----------|-----------|--------------|------------|---------------|
| <b>o_Bacillales</b>                                                  | -1.03      | -0.80      | -0.99     | 3.27E-01  | -3.20     | 0.00      | -3.17        | 3.38E-03   | 1.55E-03      |
| <b>c_Actinobacteria</b>                                              | -0.97      | -0.50      | -2.32     | 2.18E-02  | -2.23     | 0.03      | -3.19        | 1.42E-03   | 1.42E-03      |
| <b>c_Deltaproteobacteria</b>                                         | -0.80      | -1.06      | -3.66     | 3.10E-04  | -1.20     | 0.23      | -3.61        | 6.77E-04   | 3.10E-04      |
| <b>f_Christensenellaceae</b>                                         | -1.05      | -0.63      | -3.45     | 6.83E-04  | -1.71     | 0.09      | -3.61        | 3.07E-04   | 3.07E-04      |
| <b>g_Fusobacterium</b>                                               | -0.40      | -0.55      | -3.07     | 2.47E-03  | -2.14     | 0.03      | -3.64        | 2.68E-04   | 2.68E-04      |
| <b>f_S24.7</b>                                                       | -1.50      | 0.11       | -3.93     | 1.09E-04  | NA        | NA        | -3.87        | NA         | 1.09E-04      |
| <b>f_Bacteroidaceae/Bacteroides</b>                                  | -1.16      | 0.11       | -4.04     | 7.22E-05  | NA        | NA        | -3.97        | NA         | 7.22E-05      |
| <b>p_Fusobacteria/Fusobacteriia/Fusobacteriales/Fusobacteriaceae</b> | -0.56      | -0.53      | -4.72     | 4.37E-06  | -1.61     | 0.11      | -4.59        | 1.17E-05   | 4.37E-06      |
| <b>o_Desulfovibrionales/Desulfovibrionaceae</b>                      | -1.20      | -1.02      | -4.75     | 3.51E-06  | -1.62     | 0.11      | -4.64        | 9.72E-06   | 3.51E-06      |
| <b>f_Porphyrionadaceae</b>                                           | -1.71      | 0.11       | -4.77     | 3.20E-06  | NA        | NA        | -4.66        | NA         | 3.20E-06      |
| <b>g_Parabacteroides</b>                                             | -1.88      | 0.11       | -4.93     | 1.56E-06  | NA        | NA        | -4.80        | NA         | 1.56E-06      |

**Supplementary table 6:** Taxonomies significantly associated with total cholesterol (TC)

| taxonomy                                                             | Estimate_q | Estimate_b | T_value_q | P_value_q | T_value_b | P_value_b | meta_z_score | P_meta   | final_p_value |
|----------------------------------------------------------------------|------------|------------|-----------|-----------|-----------|-----------|--------------|----------|---------------|
| <b>o_Lactobacillales/f_Lactobacillaceae/Lactobacillus</b>            | -0.08      | -0.66      | -2.80     | 5.50E-03  | -3.97     | 9.57E-05  | -4.72        | 2.34E-06 | 2.34E-06      |
| <b>f_BS11</b>                                                        | -0.06      | -0.13      | -2.08     | 3.95E-02  | -2.88     | 4.32E-03  | -3.47        | 5.14E-04 | 5.14E-04      |
| <b>c_Bacilli</b>                                                     | -0.14      | 0.02       | -3.49     | 5.84E-04  | NA        | NA        | -3.44        | NA       | 5.84E-04      |
| <b>p_Fusobacteria/Fusobacteriia/Fusobacteriales/Fusobacteriaceae</b> | 0.08       | 0.09       | 3.40      | 8.23E-04  | 1.43      | 1.55E-01  | 3.37         | 7.47E-04 | 7.47E-04      |
| <b>g_Fusobacterium</b>                                               | 0.08       | 0.12       | 2.70      | 7.71E-03  | 2.40      | 1.71E-02  | 3.57         | 3.57E-04 | 3.57E-04      |
| <b>g_Prevotella</b>                                                  | 0.19       | 0.02       | 3.72      | 2.45E-04  | NA        | NA        | 3.67         | NA       | 2.45E-04      |
| <b>o_GMD14H09</b>                                                    | 0.14       | 0.05       | 3.75      | 2.36E-04  | 0.86      | 3.93E-01  | 3.68         | 1.35E-03 | 2.36E-04      |
| <b>c_Deltaproteobacteria</b>                                         | 0.19       | 0.05       | 4.49      | 1.11E-05  | 0.30      | 7.63E-01  | 4.39         | 8.98E-04 | 1.11E-05      |

**Supplementary table 7: Taxonomies significantly associated with high density lipoprotein (HDL)**

| taxonomy                                                  | Estimate_q | Estimate_b | T_value_q | P_value_q | T_value_b | P_value_b | meta_z_score | P_meta   | final_p_value |
|-----------------------------------------------------------|------------|------------|-----------|-----------|-----------|-----------|--------------|----------|---------------|
| <b>f_Veillonellaceae</b>                                  | -0.32      | 0.02       | -4.51     | 1.01E-05  | NA        | NA        | -4.42        | NA       | 1.01E-05      |
| <b>g_Phascolarctobacterium</b>                            | -0.28      | 0.02       | -4.41     | 1.54E-05  | NA        | NA        | -4.32        | NA       | 1.54E-05      |
| <b>p_Synergistetes/Synergistia/Synergistales</b>          | -0.10      | -0.19      | -0.95     | 3.44E-01  | -3.85     | 1.53E-04  | -3.79        | 8.17E-04 | 1.53E-04      |
| <b>f_Dethiosulfovibrionaceae</b>                          | -0.11      | -0.19      | -1.03     | 3.06E-01  | -3.83     | 1.65E-04  | -3.77        | 7.05E-04 | 1.65E-04      |
| <b>g_CF231</b>                                            | -0.24      | 0.02       | -3.59     | 4.02E-04  | NA        | NA        | -3.54        | NA       | 4.02E-04      |
| <b>g_Desulfovibrio</b>                                    | -0.03      | -0.21      | -0.60     | 5.46E-01  | -3.29     | 1.16E-03  | -3.25        | 6.47E-03 | 1.16E-03      |
| <b>c_Bacilli</b>                                          | 0.15       | 0.02       | 3.25      | 1.33E-03  | NA        | NA        | 3.21         | NA       | 1.33E-03      |
| <b>g_Anaeroplasm</b>                                      | 0.22       | 0.01       | 3.42      | 7.82E-04  | 0.25      | 8.03E-01  | 3.36         | 1.07E-02 | 7.82E-04      |
| <b>g_Mitsuokella</b>                                      | 0.31       | 0.39       | 0.78      | 4.52E-01  | 3.55      | 4.72E-04  | 3.50         | 2.66E-03 | 4.72E-04      |
| <b>o_Lactobacillales/f_Lactobacillaceae/Lactobacillus</b> | 0.12       | 0.10       | 3.66      | 3.07E-04  | 0.50      | 6.14E-01  | 3.61         | 3.63E-03 | 3.07E-04      |

**Supplementary table 8: Taxonomies significantly associated with low density lipoprotein (LDL)**

| taxonomy                                                                    | Estimate_q | Estimate_b | T_value_q | P_value_q | T_value_b | P_value_b | meta_z_score | P_meta   | final_p_value |
|-----------------------------------------------------------------------------|------------|------------|-----------|-----------|-----------|-----------|--------------|----------|---------------|
| <b>c_Deltaproteobacteria</b>                                                | 0.17       | -0.08      | 4.60      | 6.91E-06  | -0.54     | 5.88E-01  | -4.50        | 5.16E-03 | 6.91E-06      |
| <b>f_Enterococcaceae</b>                                                    | -0.18      | 0.31       | -0.41     | 6.86E-01  | 4.50      | 1.06E-05  | -4.40        | 4.68E-03 | 1.06E-05      |
| <b>g_Vagococcus</b>                                                         | -0.35      | 0.35       | -0.33     | 7.45E-01  | 4.14      | 4.74E-05  | -4.07        | 8.14E-03 | 4.74E-05      |
| <b>o_Desulfovibrionales/Desulfovibrionaceae</b>                             | 0.17       | -0.01      | 4.03      | 7.63E-05  | -0.11     | 9.12E-01  | -3.96        | 6.55E-03 | 7.63E-05      |
| <b>c_Gammaproteobacteria</b>                                                | 0.08       | -0.02      | 3.66      | 3.07E-04  | -0.08     | 9.40E-01  | -3.61        | 1.25E-02 | 3.07E-04      |
| <b>p_Spirochaetes/Spirochaetes/Spirochaetales/Spirochaetaceae/Treponema</b> | -0.09      | 0.02       | -3.25     | 1.31E-03  | NA        | NA        | -3.21        | NA       | 1.31E-03      |
| <b>o_GMD14H09</b>                                                           | 0.11       | -0.01      | 3.20      | 1.61E-03  | -0.14     | 8.87E-01  | -3.15        | 3.33E-02 | 1.61E-03      |
| <b>g_Mitsuokella</b>                                                        | 0.40       | 0.30       | 0.65      | 5.30E-01  | 3.55      | 4.60E-04  | 3.50         | 3.48E-03 | 4.60E-04      |
| <b>f_Enterobacteriaceae/Enterobacteriales/Escherichia</b>                   | 0.08       | 0.11       | 3.77      | 2.07E-04  | 1.52      | 1.29E-01  | 3.71         | 2.18E-04 | 2.07E-04      |
| <b>p_Proteobacteria</b>                                                     | 0.16       | 0.02       | 3.92      | 1.18E-04  | NA        | NA        | 3.85         | NA       | 1.18E-04      |
| <b>g_Fusobacterium</b>                                                      | 0.09       | 0.13       | 3.29      | 1.20E-03  | 2.98      | 3.14E-03  | 4.38         | 1.19E-05 | 1.19E-05      |

|                                                                      |      |      |      |          |      |          |      |          |          |
|----------------------------------------------------------------------|------|------|------|----------|------|----------|------|----------|----------|
| <b>f_Aeromonadaceae</b>                                              | 0.05 | 0.29 | 0.28 | 7.81E-01 | 4.84 | 2.33E-06 | 4.72 | 4.06E-04 | 2.33E-06 |
| <b>p_Fusobacteria/Fusobacteriia/Fusobacteriales/Fusobacteriaceae</b> | 0.10 | 0.09 | 5.13 | 6.82E-07 | 1.64 | 1.02E-01 | 4.97 | 3.02E-06 | 6.82E-07 |

**Supplementary table 9: Taxonomies significantly associated with ratio of low density lipoprotein to high density lipoprotein (LDL/HDL)**

| taxonomy                                                 | Estimate_q | Estimate_b | T_value_q | P_value_q | T_value_b | P_value_b | meta_z_score | P_meta   | final_p_value |
|----------------------------------------------------------|------------|------------|-----------|-----------|-----------|-----------|--------------|----------|---------------|
| <b>f_Aeromonadaceae</b>                                  | -0.06      | 0.54       | -0.17     | 8.64E-01  | 4.41      | 1.56E-05  | -4.32        | 3.35E-03 | 1.56E-05      |
| <b>g_Roseburia</b>                                       | -0.43      | 0.04       | -4.35     | 2.01E-05  | NA        | NA        | -4.26        | NA       | 2.01E-05      |
| <b>g_Anaeroplasmata</b>                                  | -0.36      | -0.06      | -3.72     | 2.71E-04  | -0.72     | 4.71E-01  | -3.64        | 2.04E-03 | 2.71E-04      |
| <b>c_Bacilli</b>                                         | -0.25      | 0.04       | -3.49     | 5.78E-04  | NA        | NA        | -3.44        | NA       | 5.78E-04      |
| <b>o_Turicibacterales/Turicibacteraceae/Turicibacter</b> | -0.26      | -0.24      | -3.39     | 8.31E-04  | -0.80     | 4.25E-01  | -3.34        | 3.42E-03 | 8.31E-04      |
| <b>o_Anaeroplasmatales/Anaeroplasmataceae</b>            | -0.33      | -0.09      | -3.37     | 9.23E-04  | -1.09     | 2.78E-01  | -3.31        | 1.88E-03 | 9.23E-04      |
| <b>f_Lactobacillaceae/Lactobacillus</b>                  | -0.17      | -0.31      | -3.27     | 1.25E-03  | -1.04     | 2.98E-01  | -3.23        | 2.54E-03 | 1.25E-03      |
| <b>o_Spirochaetales/Spirochaetaceae/Treponema</b>        | -0.17      | 0.04       | -3.16     | 1.76E-03  | NA        | NA        | -3.13        | NA       | 1.76E-03      |
| <b>g_Coprococcus</b>                                     | -0.31      | 0.04       | -3.08     | 2.29E-03  | NA        | NA        | -3.05        | NA       | 2.29E-03      |
| <b>f_Paraprevotellaceae</b>                              | 0.41       | 0.04       | 3.08      | 2.33E-03  | NA        | NA        | 3.04         | NA       | 2.33E-03      |
| <b>f_Porphyrimonadaceae</b>                              | 0.39       | 0.04       | 3.13      | 1.95E-03  | NA        | NA        | 3.10         | NA       | 1.95E-03      |
| <b>g_Desulfovibrio</b>                                   | 0.21       | 0.20       | 2.54      | 1.20E-02  | 1.90      | 5.82E-02  | 3.12         | 1.83E-03 | 1.83E-03      |
| <b>p_Proteobacteria</b>                                  | 0.27       | 0.04       | 3.18      | 1.69E-03  | NA        | NA        | 3.14         | NA       | 1.69E-03      |
| <b>g_Actinobacillus</b>                                  | 0.17       | 0.21       | 2.08      | 4.00E-02  | 2.78      | 5.84E-03  | 3.40         | 6.71E-04 | 6.71E-04      |
| <b>c_Gammaproteobacteria</b>                             | 0.16       | 0.43       | 3.53      | 5.01E-04  | 1.00      | 3.17E-01  | 3.48         | 1.53E-03 | 5.01E-04      |
| <b>g_rc4.4</b>                                           | 0.32       | 0.30       | 3.19      | 1.65E-03  | 1.89      | 6.06E-02  | 3.55         | 3.81E-04 | 3.81E-04      |
| <b>f_Mogibacteriaceae</b>                                | 0.37       | 0.04       | 3.64      | 3.39E-04  | NA        | NA        | 3.58         | NA       | 3.39E-04      |
| <b>o_Pasteurellales/Pasteurellaceae</b>                  | 0.19       | 0.20       | 2.60      | 1.05E-02  | 2.56      | 1.11E-02  | 3.61         | 3.10E-04 | 3.10E-04      |
| <b>g_Epulopiscium</b>                                    | 0.06       | -0.45      | 0.73      | 4.65E-01  | -3.72     | 2.50E-04  | 3.66         | 3.82E-02 | 2.50E-04      |
| <b>p_Synergistetes/Synergistia/Synergistales</b>         | 0.29       | 0.29       | 1.49      | 1.37E-01  | 3.81      | 1.77E-04  | 3.75         | 2.13E-04 | 1.77E-04      |
| <b>f_Peptococcaceae</b>                                  | 0.33       | 0.44       | 3.48      | 6.10E-04  | 1.92      | 5.62E-02  | 3.77         | 1.61E-04 | 1.61E-04      |

|                                                                      |      |      |      |          |      |          |      |          |          |
|----------------------------------------------------------------------|------|------|------|----------|------|----------|------|----------|----------|
| <b>c_Deltaproteobacteria/Dethiosulfovibrionaceae</b>                 | 0.29 | 0.01 | 3.95 | 1.02E-04 | 0.04 | 9.71E-01 | 3.89 | 5.55E-03 | 1.02E-04 |
| <b>f_Dethiosulfovibrionaceae</b>                                     |      |      |      |          |      |          |      |          |          |
| <b>o_Desulfovibrionales/Desulfovibrionaceae</b>                      | 0.35 | 0.09 | 4.03 | 7.60E-05 | 0.41 | 6.83E-01 | 3.96 | 2.02E-03 | 7.60E-05 |
| <b>f_Enterobacteriaceae/Enterobacteriales</b>                        | 0.16 | 0.34 | 3.45 | 6.70E-04 | 2.35 | 1.96E-02 | 4.06 | 5.00E-05 | 5.00E-05 |
| <b>g_CF231</b>                                                       | 0.42 | 0.04 | 4.14 | 4.78E-05 | NA   | NA       | 4.07 | NA       | 4.78E-05 |
| <b>f_Veillonellaceae</b>                                             | 0.47 | 0.04 | 4.14 | 4.74E-05 | NA   | NA       | 4.07 | NA       | 4.74E-05 |
| <b>p_Fusobacteria/Fusobacteriia/Fusobacteriales/Fusobacteriaceae</b> | 0.15 | 0.28 | 3.59 | 4.19E-04 | 2.51 | 1.26E-02 | 4.26 | 2.06E-05 | 2.06E-05 |
| <b>g_Phascalactobacterium</b>                                        | 0.44 | 0.04 | 4.39 | 1.70E-05 | NA   | NA       | 4.30 | NA       | 1.70E-05 |

**Supplementary table 10: Taxonomies significantly associated with atherosclerosis index (AI)**

| taxonomy                                                  | Estimate_q | Estimate_b | T_value_q | p_value_q | T_value_b | p_value_b | meta_z_score | p_meta   | final_p_value |
|-----------------------------------------------------------|------------|------------|-----------|-----------|-----------|-----------|--------------|----------|---------------|
| <b>c_Bacilli</b>                                          | -0.41      | 0.05       | -4.66     | 5.17E-06  | NA        | NA        | -4.56        | NA       | 5.17E-06      |
| <b>o_Lactobacillales/f_Lactobacillaceae/Lactobacillus</b> | -0.31      | -0.57      | -4.65     | 5.51E-06  | -1.469    | 1.43E-01  | -4.54        | 2.15E-05 | 5.51E-06      |
| <b>g_Roseburia</b>                                        | -0.52      | 0.05       | -4.10     | 5.62E-05  | NA        | NA        | -4.03        | NA       | 5.62E-05      |
| <b>f_Aeromonadaceae</b>                                   | -0.09      | 0.60       | -0.26     | 8.00E-01  | 3.802     | 1.82E-04  | -3.74        | 1.36E-02 | 1.82E-04      |
| <b>g_Epulumiscium</b>                                     | -0.01      | -0.54      | -0.06     | 9.50E-01  | -3.489    | 5.77E-04  | -3.44        | 1.32E-02 | 5.77E-04      |
| <b>f_Clostridiaceae</b>                                   | -0.47      | 0.05       | -3.49     | 5.77E-04  | NA        | NA        | -3.44        | NA       | 5.77E-04      |
| <b>g_Anaeroplasmata</b>                                   | -0.46      | -0.07      | -3.49     | 6.22E-04  | -0.615    | 5.39E-01  | -3.42        | 4.32E-03 | 6.22E-04      |
| <b>o_Turicibacterales/Turicibacteraceae/Turicibacter</b>  | -0.33      | -0.33      | -3.30     | 1.11E-03  | -0.853    | 3.95E-01  | -3.26        | 3.63E-03 | 1.11E-03      |
| <b>o_Spirochaetales/Spirochaetaceae/Treponema</b>         | -0.22      | 0.05       | -3.16     | 1.76E-03  | NA        | NA        | -3.13        | NA       | 1.76E-03      |
| <b>o_Anaeroplasmatales/Anaeroplasmataceae</b>             | -0.40      | -0.09      | -3.11     | 2.18E-03  | -0.826    | 4.10E-01  | -3.06        | 5.95E-03 | 2.18E-03      |
| <b>f_Mogibacteriaceae</b>                                 | 0.37       | 0.05       | 2.82      | 5.21E-03  | NA        | NA        | 2.79         | NA       | 5.21E-03      |
| <b>p_Proteobacteria</b>                                   | 0.31       | 0.05       | 2.88      | 4.29E-03  | NA        | NA        | 2.86         | NA       | 4.29E-03      |
| <b>f_Porphyrimonadaceae</b>                               | 0.49       | 0.05       | 3.01      | 2.85E-03  | NA        | NA        | 2.98         | NA       | 2.85E-03      |
| <b>o_Desulfovibrionales/Desulfovibrionaceae</b>           | 0.38       | 0.26       | 3.33      | 9.95E-04  | 0.944     | 3.46E-01  | 3.29         | 2.75E-03 | 9.95E-04      |
| <b>c_Gammaproteobacteria</b>                              | 0.19       | 0.83       | 3.17      | 1.72E-03  | 1.537     | 1.26E-01  | 3.30         | 9.69E-04 | 9.69E-04      |

|                                                                      |      |      |      |          |       |          |      |          |          |
|----------------------------------------------------------------------|------|------|------|----------|-------|----------|------|----------|----------|
| <b>g_Actinobacillus</b>                                              | 0.18 | 0.28 | 1.85 | 6.63E-02 | 2.910 | 3.96E-03 | 3.34 | 8.51E-04 | 8.51E-04 |
| <b>g_Desulfovibrio</b>                                               | 0.24 | 0.36 | 2.15 | 3.25E-02 | 2.772 | 6.01E-03 | 3.45 | 5.51E-04 | 5.51E-04 |
| <b>g_rc4.4</b>                                                       | 0.40 | 0.40 | 3.07 | 2.43E-03 | 1.960 | 5.12E-02 | 3.52 | 4.27E-04 | 4.27E-04 |
| <b>o_Pasteurellales/Pasteurellaceae</b>                              | 0.23 | 0.26 | 2.44 | 1.62E-02 | 2.626 | 9.21E-03 | 3.54 | 3.98E-04 | 3.98E-04 |
| <b>f_Paraprevotellaceae</b>                                          | 0.62 | 0.05 | 3.63 | 3.45E-04 | NA    | NA       | 3.58 | NA       | 3.45E-04 |
| <b>c_Deltaproteobacteria</b>                                         | 0.35 | 0.26 | 3.72 | 2.50E-04 | 0.678 | 4.99E-01 | 3.66 | 2.15E-03 | 2.50E-04 |
| <b>o_Enterobacteriales/Enterobacteriaceae/Escherichia</b>            | 0.19 | 0.38 | 3.26 | 1.31E-03 | 2.043 | 4.22E-02 | 3.71 | 2.08E-04 | 2.08E-04 |
| <b>p_Fusobacteria/Fusobacteriia/Fusobacteriales/Fusobacteriaceae</b> | 0.16 | 0.34 | 2.99 | 3.17E-03 | 2.395 | 1.74E-02 | 3.77 | 1.64E-04 | 1.64E-04 |
| <b>f_Peptococcaceae</b>                                              | 0.46 | 0.57 | 3.78 | 1.97E-04 | 1.965 | 5.06E-02 | 4.01 | 5.95E-05 | 5.95E-05 |
| <b>g_CF231</b>                                                       | 0.57 | 0.05 | 4.43 | 1.46E-05 | NA    | NA       | 4.33 | NA       | 1.46E-05 |
| <b>f_Dethiosulfovibrionaceae</b>                                     | 0.39 | 0.44 | 1.67 | 9.78E-02 | 4.507 | 1.03E-05 | 4.41 | 1.79E-05 | 1.03E-05 |
| <b>p_Synergistetes/Synergistia/Synergistales</b>                     | 0.36 | 0.44 | 1.53 | 1.27E-01 | 4.522 | 9.65E-06 | 4.42 | 2.59E-05 | 9.65E-06 |
| <b>f_Veillonellaceae</b>                                             | 0.68 | 0.05 | 4.81 | 2.65E-06 | NA    | NA       | 4.70 | NA       | 2.65E-06 |
| <b>g_Phascolarctobacterium</b>                                       | 0.63 | 0.05 | 4.99 | 1.14E-06 | NA    | NA       | 4.87 | NA       | 1.14E-06 |

**Supplementary table 11.** KEGG functional pathway significantly associated with blood glucose.

| <b>LEVEL1</b>                               | <b>LEVEL2</b>                               | <b>LEVEL3</b>                                          | <b>Estimate</b> | <b>T_value</b> | <b>z_score</b> | <b>p_value</b> |
|---------------------------------------------|---------------------------------------------|--------------------------------------------------------|-----------------|----------------|----------------|----------------|
| <b>Metabolism</b>                           | Energy Metabolism                           | Carbon fixation pathways in prokaryotes                | -20.09          | -5.75          | -5.56          | 2.71E-08       |
| <b>Metabolism</b>                           | Energy Metabolism                           | Nitrogen metabolism                                    | -31.39          | -5.74          | -5.55          | 2.89E-08       |
| <b>Metabolism</b>                           | Biosynthesis of Other Secondary Metabolites | Tropane, piperidine and pyridine alkaloid biosynthesis | -21.48          | -5.44          | -5.27          | 1.34E-07       |
| <b>Metabolism</b>                           | Amino Acid Metabolism                       | Cysteine and methionine metabolism                     | -70.29          | -5.36          | -5.20          | 2.00E-07       |
| <b>Environmental Information Processing</b> | Signal Transduction                         | MAPK signaling pathway - yeast                         | -11.57          | -5.31          | -5.16          | 2.53E-07       |
| <b>Metabolism</b>                           | Metabolism of Other Amino Acids             | D-Glutamine and D-glutamate metabolism                 | -29.77          | -5.29          | -5.14          | 2.71E-07       |
| <b>Metabolism</b>                           | Xenobiotics Biodegradation and Metabolism   | Ethylbenzene degradation                               | -11.45          | -5.03          | -4.90          | 9.53E-07       |
| <b>Metabolism</b>                           | Carbohydrate Metabolism                     | Citrate cycle (TCA cycle)                              | -10.37          | -4.92          | -4.79          | 1.65E-06       |
| <b>Metabolism</b>                           | Nucleotide Metabolism                       | Purine metabolism                                      | -39.82          | -4.69          | -4.58          | 4.54E-06       |

|                                             |                                             |                                                     |        |       |       |          |
|---------------------------------------------|---------------------------------------------|-----------------------------------------------------|--------|-------|-------|----------|
| <b>Metabolism</b>                           | Biosynthesis of Other Secondary Metabolites | Isoquinoline alkaloid biosynthesis                  | -7.48  | -4.64 | -4.54 | 5.72E-06 |
| <b>Metabolism</b>                           | Biosynthesis of Other Secondary Metabolites | Novobiocin biosynthesis                             | -22.49 | -4.61 | -4.50 | 6.69E-06 |
| <b>Metabolism</b>                           | Metabolism of Cofactors and Vitamins        | Folate biosynthesis                                 | -11.34 | -4.53 | -4.44 | 9.15E-06 |
| <b>Metabolism</b>                           | Xenobiotics Biodegradation and Metabolism   | Naphthalene degradation                             | -9.80  | -4.49 | -4.40 | 1.09E-05 |
| <b>Environmental Information Processing</b> | Signaling Molecules and Interaction         | Cellular antigens                                   | -3.28  | -4.33 | -4.25 | 2.16E-05 |
| <b>Metabolism</b>                           | Xenobiotics Biodegradation and Metabolism   | Toluene degradation                                 | -4.54  | -4.22 | -4.14 | 3.51E-05 |
| <b>Metabolism</b>                           | Amino Acid Metabolism                       | Tyrosine metabolism                                 | -17.09 | -4.19 | -4.11 | 3.96E-05 |
| <b>Metabolism</b>                           | Glycan Biosynthesis and Metabolism          | Lipopolysaccharide biosynthesis proteins            | -4.03  | -4.09 | -4.02 | 5.88E-05 |
| <b>Organismal Systems</b>                   | Digestive System                            | Protein digestion and absorption                    | -2.40  | -4.01 | -3.94 | 8.13E-05 |
| <b>Metabolism</b>                           | Glycan Biosynthesis and Metabolism          | Lipopolysaccharide biosynthesis                     | -3.17  | -4.00 | -3.93 | 8.39E-05 |
| <b>Metabolism</b>                           | Metabolism of Terpenoids and Polyketides    | Prenyltransferases                                  | -13.28 | -3.98 | -3.91 | 9.11E-05 |
| <b>Metabolism</b>                           | Metabolism of Other Amino Acids             | Taurine and hypotaurine metabolism                  | -14.02 | -3.96 | -3.90 | 9.74E-05 |
| <b>Metabolism</b>                           | Amino Acid Metabolism                       | Glycine, serine and threonine metabolism            | -33.63 | -3.95 | -3.88 | 1.03E-04 |
| <b>Metabolism</b>                           | Metabolism of Cofactors and Vitamins        | Nicotinate and nicotinamide metabolism              | -18.05 | -3.94 | -3.87 | 1.09E-04 |
| <b>Metabolism</b>                           | Glycan Biosynthesis and Metabolism          | Glycosphingolipid biosynthesis - ganglio series     | -3.13  | -3.92 | -3.86 | 1.14E-04 |
| <b>Metabolism</b>                           | Metabolism of Cofactors and Vitamins        | Riboflavin metabolism                               | -10.47 | -3.89 | -3.83 | 1.29E-04 |
| <b>Metabolism</b>                           | Carbohydrate Metabolism                     | Butanoate metabolism                                | -17.05 | -3.79 | -3.73 | 1.94E-04 |
| <b>Environmental Information Processing</b> | Membrane Transport                          | Bacterial secretion system                          | -16.45 | -3.70 | -3.65 | 2.63E-04 |
| <b>Metabolism</b>                           | Enzyme Families                             | Peptidases                                          | -34.45 | -3.69 | -3.63 | 2.80E-04 |
| <b>Metabolism</b>                           | Glycan Biosynthesis and Metabolism          | N-Glycan biosynthesis                               | -4.06  | -3.67 | -3.62 | 2.97E-04 |
| <b>Metabolism</b>                           | Metabolism of Cofactors and Vitamins        | Ubiquinone and other terpenoid-quinone biosynthesis | -3.79  | -3.65 | -3.60 | 3.19E-04 |
| <b>Cellular Processes</b>                   | Transport and Catabolism                    | Peroxisome                                          | -8.84  | -3.65 | -3.59 | 3.26E-04 |
| <b>Metabolism</b>                           | Amino Acid Metabolism                       | Alanine, aspartate and glutamate metabolism         | -21.73 | -3.61 | -3.56 | 3.77E-04 |
| <b>Metabolism</b>                           | Glycan Biosynthesis and Metabolism          | Glycosaminoglycan degradation                       | -3.61  | -3.59 | -3.54 | 3.99E-04 |
| <b>Metabolism</b>                           | Lipid Metabolism                            | Arachidonic acid metabolism                         | -3.05  | -3.57 | -3.52 | 4.24E-04 |
| <b>Metabolism</b>                           | Metabolism of Terpenoids and Polyketides    | Polyketide sugar unit biosynthesis                  | -12.97 | -3.55 | -3.50 | 4.58E-04 |

|                                             |                                             |                                                         |        |       |       |          |
|---------------------------------------------|---------------------------------------------|---------------------------------------------------------|--------|-------|-------|----------|
| <b>Metabolism</b>                           | Glycan Biosynthesis and Metabolism          | Glycosyltransferases                                    | -10.87 | -3.49 | -3.44 | 5.74E-04 |
| <b>Metabolism</b>                           | Metabolism of Cofactors and Vitamins        | Biotin metabolism                                       | -8.77  | -3.44 | -3.39 | 6.89E-04 |
| <b>Metabolism</b>                           | Metabolism of Cofactors and Vitamins        | Retinol metabolism                                      | -3.95  | -3.32 | -3.27 | 1.06E-03 |
| <b>Metabolism</b>                           | Nucleotide Metabolism                       | Pyrimidine metabolism                                   | -27.69 | -3.23 | -3.19 | 1.44E-03 |
| <b>Metabolism</b>                           | Metabolism of Other Amino Acids             | Glutathione metabolism                                  | -6.75  | -3.21 | -3.17 | 1.53E-03 |
| <b>Organismal Systems</b>                   | Endocrine System                            | Adipocytokine signaling pathway                         | -4.15  | -3.16 | -3.13 | 1.76E-03 |
| <b>Metabolism</b>                           | Metabolism of Cofactors and Vitamins        | One carbon pool by folate                               | -14.57 | -3.11 | -3.08 | 2.07E-03 |
| <b>Metabolism</b>                           | Amino Acid Metabolism                       | Phenylalanine metabolism                                | -12.20 | -3.07 | -3.04 | 2.40E-03 |
| <b>Metabolism</b>                           | Biosynthesis of Other Secondary Metabolites | Streptomycin biosynthesis                               | -13.32 | -3.02 | -2.99 | 2.82E-03 |
| <b>Metabolism</b>                           | Metabolism of Terpenoids and Polyketides    | Biosynthesis of siderophore group nonribosomal peptides | -2.95  | -2.99 | -2.96 | 3.12E-03 |
| <b>Metabolism</b>                           | Biosynthesis of Other Secondary Metabolites | Penicillin and cephalosporin biosynthesis               | -3.53  | -2.89 | -2.86 | 4.19E-03 |
| <b>Metabolism</b>                           | Biosynthesis of Other Secondary Metabolites | Stilbenoid, diarylheptanoid and gingerol biosynthesis   | -0.43  | -1.65 | -2.83 | 4.64E-03 |
| <b>Environmental Information Processing</b> | Signal Transduction                         | Phosphatidylinositol signaling system                   | -8.28  | -2.84 | -2.82 | 4.85E-03 |
| <b>Metabolism</b>                           | Glycan Biosynthesis and Metabolism          | Peptidoglycan biosynthesis                              | -21.48 | -2.83 | -2.80 | 5.05E-03 |
| <b>Metabolism</b>                           | Metabolism of Other Amino Acids             | beta-Alanine metabolism                                 | -7.37  | -2.78 | -2.75 | 5.90E-03 |
| <b>Metabolism</b>                           | Metabolism of Cofactors and Vitamins        | Vitamin B6 metabolism                                   | -10.32 | -2.77 | -2.74 | 6.14E-03 |
| <b>Metabolism</b>                           | Xenobiotics Biodegradation and Metabolism   | Drug metabolism - other enzymes                         | -15.31 | -2.76 | -2.73 | 6.26E-03 |
| <b>Metabolism</b>                           | Metabolism of Terpenoids and Polyketides    | Terpenoid backbone biosynthesis                         | -18.14 | -2.70 | -2.68 | 7.40E-03 |
| <b>Metabolism</b>                           | Amino Acid Metabolism                       | Valine, leucine and isoleucine degradation              | -4.66  | -2.69 | -2.66 | 7.73E-03 |
| <b>Metabolism</b>                           | Metabolism of Terpenoids and Polyketides    | Geraniol degradation                                    | -2.09  | -2.68 | -2.66 | 7.85E-03 |
| <b>Metabolism</b>                           | Energy Metabolism                           | Oxidative phosphorylation                               | -10.49 | -2.67 | -2.65 | 8.04E-03 |
| <b>Metabolism</b>                           | Lipid Metabolism                            | Fatty acid metabolism                                   | -5.54  | -2.66 | -2.64 | 8.37E-03 |
| <b>Metabolism</b>                           | Xenobiotics Biodegradation and Metabolism   | Aminobenzoate degradation                               | -6.85  | -2.64 | -2.61 | 8.94E-03 |
| <b>Metabolism</b>                           | Metabolism of Other Amino Acids             | Selenocompound metabolism                               | -20.28 | -2.59 | -2.57 | 1.01E-02 |
| <b>Metabolism</b>                           | Metabolism of Cofactors and Vitamins        | Lipoic acid metabolism                                  | -2.90  | -2.59 | -2.57 | 1.02E-02 |
| <b>Metabolism</b>                           | Lipid Metabolism                            | Steroid hormone biosynthesis                            | -1.21  | -2.55 | -2.53 | 1.14E-02 |

|                                             |                                             |                                              |        |       |       |          |
|---------------------------------------------|---------------------------------------------|----------------------------------------------|--------|-------|-------|----------|
| <b>Metabolism</b>                           | Metabolism of Terpenoids and Polyketides    | Biosynthesis of vancomycin group antibiotics | -8.42  | -2.50 | -2.48 | 1.30E-02 |
| <b>Metabolism</b>                           | Biosynthesis of Other Secondary Metabolites | Isoflavonoid biosynthesis                    | -0.81  | -2.12 | -2.47 | 1.37E-02 |
| <b>Organismal Systems</b>                   | Excretory System                            | Proximal tubule bicarbonate reclamation      | -2.84  | -2.47 | -2.45 | 1.42E-02 |
| <b>Metabolism</b>                           | Carbohydrate Metabolism                     | Inositol phosphate metabolism                | -5.45  | -2.47 | -2.45 | 1.43E-02 |
| <b>Cellular Processes</b>                   | Transport and Catabolism                    | Lysosome                                     | -2.78  | -2.28 | -2.27 | 2.32E-02 |
| <b>Metabolism</b>                           | Carbohydrate Metabolism                     | Propanoate metabolism                        | -11.07 | -2.27 | -2.26 | 2.40E-02 |
| <b>Metabolism</b>                           | Lipid Metabolism                            | Steroid biosynthesis                         | -0.71  | -2.31 | 1.38  | 2.20E-02 |
| <b>Metabolism</b>                           | Carbohydrate Metabolism                     | C5-Branched dibasic acid metabolism          | 16.42  | 2.49  | 2.47  | 1.36E-02 |
| <b>Environmental Information Processing</b> | Signal Transduction                         | Two-component system                         | 11.38  | 2.55  | 2.53  | 1.14E-02 |
| <b>Metabolism</b>                           | Biosynthesis of Other Secondary Metabolites | Butirosin and neomycin biosynthesis          | 6.88   | 2.63  | 2.60  | 9.20E-03 |
| <b>Metabolism</b>                           | Xenobiotics Biodegradation and Metabolism   | Bisphenol degradation                        | 12.37  | 2.64  | 2.61  | 8.96E-03 |
| <b>Metabolism</b>                           | Enzyme Families                             | Protein kinases                              | 9.13   | 2.67  | 2.65  | 8.12E-03 |
| <b>Metabolism</b>                           | Carbohydrate Metabolism                     | Galactose metabolism                         | 11.17  | 2.69  | 2.67  | 7.58E-03 |
| <b>Metabolism</b>                           | Lipid Metabolism                            | Glycerolipid metabolism                      | 10.02  | 2.82  | 2.79  | 5.24E-03 |
| <b>Metabolism</b>                           | Amino Acid Metabolism                       | Valine, leucine and isoleucine biosynthesis  | 18.32  | 2.85  | 2.82  | 4.79E-03 |
| <b>Metabolism</b>                           | Energy Metabolism                           | Photosynthesis                               | 11.00  | 3.03  | 3.00  | 2.73E-03 |
| <b>Metabolism</b>                           | Energy Metabolism                           | Photosynthesis proteins                      | 11.43  | 3.12  | 3.09  | 2.01E-03 |
| <b>Metabolism</b>                           | Carbohydrate Metabolism                     | Starch and sucrose metabolism                | 14.81  | 3.53  | 3.48  | 5.05E-04 |
| <b>Cellular Processes</b>                   | Cell Motility                               | Cytoskeleton proteins                        | 11.21  | 3.56  | 3.51  | 4.48E-04 |
| <b>Metabolism</b>                           | Carbohydrate Metabolism                     | Fructose and mannose metabolism              | 20.46  | 3.72  | 3.66  | 2.48E-04 |
| <b>Organismal Systems</b>                   | Endocrine System                            | Insulin signaling pathway                    | 10.16  | 3.76  | 3.70  | 2.15E-04 |
| <b>Metabolism</b>                           | Carbohydrate Metabolism                     | Pentose and glucuronate interconversions     | 15.93  | 3.77  | 3.71  | 2.06E-04 |
| <b>Metabolism</b>                           | Lipid Metabolism                            | Primary bile acid biosynthesis               | 6.09   | 3.88  | 3.82  | 1.36E-04 |
| <b>Environmental Information Processing</b> | Membrane Transport                          | ABC transporters                             | 10.94  | 3.97  | 3.90  | 9.49E-05 |
| <b>Metabolism</b>                           | Lipid Metabolism                            | Secondary bile acid biosynthesis             | 6.23   | 4.15  | 4.07  | 4.66E-05 |
| <b>Cellular Processes</b>                   | Cell Motility                               | Bacterial chemotaxis                         | 5.67   | 4.44  | 4.34  | 1.39E-05 |



|                                             |                                          |                                       |       |      |      |          |
|---------------------------------------------|------------------------------------------|---------------------------------------|-------|------|------|----------|
| <b>Metabolism</b>                           | Metabolism of Terpenoids and Polyketides | Biosynthesis of ansamycins            | 11.07 | 4.45 | 4.36 | 1.30E-05 |
| <b>Metabolism</b>                           | Metabolism of Other Amino Acids          | D-Arginine and D-ornithine metabolism | 2.77  | 4.52 | 4.42 | 9.65E-06 |
| <b>Environmental Information Processing</b> | Membrane Transport                       | Transporters                          | 10.98 | 4.60 | 4.50 | 6.73E-06 |
| <b>Cellular Processes</b>                   | Cell Motility                            | Bacterial motility proteins           | 7.09  | 4.64 | 4.53 | 5.76E-06 |
| <b>Cellular Processes</b>                   | Cell Motility                            | Flagellar assembly                    | 6.14  | 4.80 | 4.69 | 2.77E-06 |
| <b>Metabolism</b>                           | Carbohydrate Metabolism                  | Pentose phosphate pathway             | 25.41 | 5.07 | 4.94 | 7.88E-07 |
| <b>Organismal Systems</b>                   | Environmental Adaptation                 | Plant-pathogen interaction            | 21.32 | 5.15 | 5.01 | 5.47E-07 |
